# Supplementary material for: Mild partial deoxygenation of esters catalyzed by an oxazolinylborate-coordinated rhodium silylene
Source: Royal Society of Chemistry journal article supplement (doi:10.1039/c5dt02844b), 2015-01-01
Supplement: c5dt02844b1.pdf [file c5dt02844b1.pdf]

## Electronic supplementary information

### Mild partial deoxygenation of esters catalyzed by an oxazoline-coordinated rhodium silylene

Songchen Xu, Jeffery S. Boschen, Abhranil Biswas, Takeshi Kobayashi, Marek Pruski, Theresa L. Windus, and Aaron D. Sadow\*

U.S. Department of Energy Ames Laboratory and Department of Chemistry, Iowa State University, 1605 Gilman Hall, Ames, Iowa, 50011, United States

#### EXPERIMENTAL DETAILS

**General Considerations.** All reactions were performed under a dry argon atmosphere using standard Schlenk techniques or under a nitrogen atmosphere in a glovebox, unless otherwise indicated. Benzene, pentane, methylene chloride, and diethyl ether were dried and deoxygenated using an IT PureSolv system. Chloroform was heated to reflux over  $\text{CaH}_2$ , and then distilled before use. Bromobenzene and bromobenzene- $d_5$  were degassed under vacuum and stored with activated molecular sieves. Benzene- $d_6$  was stirred over Na/K alloy and then vacuum transferred. Compound **1** was synthesized according to the previously published work.<sup>1</sup> Tris(perfluorophenyl)borane was synthesized from boron trichloride and bromopentafluorobenzene.<sup>2</sup> Phenylsilane was synthesized by reduction of trichlorophenylsilane with  $\text{LiAlH}_4$ . Benzyldimethylsilane was purchased from Gelest and stored over 4 Å molecular sieves in the glovebox. Ethyl acetate was purchased from Fisher Scientific, distilled over  $\text{K}_2\text{CO}_3$ , and stored over 4 Å molecular sieves in the glovebox. Commercial esters, amides, ketones and aldehydes were degassed and stored in the glovebox. Liquid samples were stored over 4 Å molecular sieves.

$^1\text{H}$ ,  $^{13}\text{C}\{^1\text{H}\}$ , and  $^{11}\text{B}$  NMR spectra were collected on a Varian MR 400 MHz spectrometer or an Avance II 600 MHz NMR spectrometer.  $^{15}\text{N}$  NMR chemical shifts were determined by  $^1\text{H}$ - $^{15}\text{N}$  HMBC experiments on an Avance II 600 MHz NMR spectrometer or a Bruker Avance II 700 MHz spectrometer with a Bruker Z-gradient inverse TXI  $^1\text{H}/^{13}\text{C}/^{15}\text{N}$  5 mm cryoprobe.  $^{15}\text{N}$  chemical shifts were originally referenced to an external liquid  $\text{NH}_3$  standard and

recalculated to the CH<sub>3</sub>NO<sub>2</sub> chemical shift scale by adding -381.9 ppm. <sup>29</sup>Si NMR chemical shift was determined by <sup>1</sup>H-<sup>29</sup>Si HMBC experiment on an Avance II 600 MHz NMR spectrometer. Infrared spectra were recorded on a Bruker Vertex spectrometer. Mass spectrometry data for the catalyst were acquired on an Agilent 6540 QTOF accurate mass spectrometer equipped with 1200 series U-HPLC system and ESI ion source. Mass spectrometry data of the isolated organic substances were acquired from an Agilent Technologies 7890A GC system coupled with 5975C inert MSD with Triple-Axis detector. Elemental analyses were performed using a Perkin-Elmer 2400 Series II CHN/S in Iowa State Chemical Instrumentation Facility.

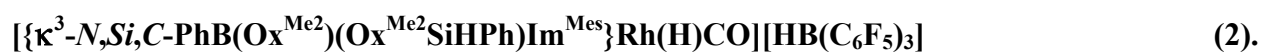

Tris(perfluorophenyl)borane (0.0895 g, 0.175 mmol) and {PhB(Ox<sup>Me2</sup>)<sub>2</sub>Im<sup>Mes</sup>}RhH(SiH<sub>2</sub>Ph)CO (0.124 g, 0.175 mmol) were mixed in benzene (5 mL). Dark brown oily precipitate formed in a few minutes, and the solution was then stirred at room temperature for another 3 h. The top layer, a transparent brown solution, was decanted, and the oil was then washed with benzene (2 × 5 mL) and pentane (5 mL), and dried under vacuum to give the product as black solid (0.184 g, 0.151 mmol, 86.3%). <sup>1</sup>H NMR (bromobenzene-*d*<sub>5</sub>, 400 MHz): δ 7.65 (d, <sup>3</sup>J<sub>HH</sub> = 6.8 Hz, 2 H, *o*-BC<sub>6</sub>H<sub>5</sub>), 7.43 (m, 4 H, C<sub>6</sub>H<sub>5</sub>), 7.14 (m, 2 H, C<sub>6</sub>H<sub>5</sub>), 6.81 (d, <sup>3</sup>J<sub>HH</sub> = 6.8 Hz, 2 H, *o*-SiC<sub>6</sub>H<sub>5</sub>), 6.72 (s, 1 H, *m*-C<sub>6</sub>H<sub>2</sub>Me<sub>3</sub>), 6.64 (s, 1 H, *m*-C<sub>6</sub>H<sub>2</sub>Me<sub>3</sub>), 6.34 (d, <sup>3</sup>J<sub>HH</sub> = 2.0 Hz, 1 H, 4,5H-N<sub>2</sub>C<sub>3</sub>H<sub>2</sub>Mes), 6.25 (d, <sup>3</sup>J<sub>HH</sub> = 2.0 Hz, 1 H, 4,5H-N<sub>2</sub>C<sub>3</sub>H<sub>2</sub>Mes), 5.15 (vt, *J* = 4.0 Hz, <sup>1</sup>J<sub>SiH</sub> = 234.0 Hz, 1 H, SiH), 3.89 (m, 3 H, CNCMe<sub>2</sub>CH<sub>2</sub>O), 3.80 (d, <sup>2</sup>J<sub>HH</sub> = 9.6 Hz, 1 H, CNCMe<sub>2</sub>CH<sub>2</sub>O), 2.06 (s, 3 H, *p*-C<sub>6</sub>H<sub>2</sub>Me<sub>3</sub>), 1.68 (s, 3 H, *o*-C<sub>6</sub>H<sub>2</sub>Me<sub>3</sub>), 1.10 (s, 3 H, CNCMe<sub>2</sub>CH<sub>2</sub>O), 1.07 (s, 3 H, CNCMe<sub>2</sub>CH<sub>2</sub>O), 1.04 (s, 3 H, CNCMe<sub>2</sub>CH<sub>2</sub>O), 0.76 (s, 3 H, *o*-C<sub>6</sub>H<sub>2</sub>Me<sub>3</sub>), 0.68 (s, 3 H, CNCMe<sub>2</sub>CH<sub>2</sub>O), -12.92 (dd, <sup>1</sup>J<sub>RhH</sub> = 20.0 Hz, <sup>3</sup>J<sub>HH</sub> = 4.0 Hz, 1 H, RhH). <sup>13</sup>C{<sup>1</sup>H} NMR (bromobenzene-*d*<sub>5</sub>, 150 MHz): δ 186.33 (d, <sup>1</sup>J<sub>RhC</sub> = 51 Hz, 2C-N<sub>2</sub>C<sub>3</sub>H<sub>2</sub>Mes), 169.23 (d, <sup>1</sup>J<sub>RhC</sub> = 37.5 Hz, CO), 148 (br, C<sub>6</sub>F<sub>5</sub>), 147 (br, C<sub>6</sub>F<sub>5</sub>), 138.06 (*p*-C<sub>6</sub>H<sub>2</sub>Me<sub>3</sub>), 137.6 (br, *ipso*-C<sub>6</sub>H<sub>5</sub>), 136.4 (br, C<sub>6</sub>F<sub>5</sub>), 136.0 (br, *ipso*-C<sub>6</sub>H<sub>5</sub>), 135 (br, C<sub>6</sub>F<sub>5</sub>), 133.89 (*o*-BC<sub>6</sub>H<sub>5</sub>), 133.76 (*ipso*-C<sub>6</sub>H<sub>2</sub>Me<sub>3</sub>), 133.38 (*o*-SiC<sub>6</sub>H<sub>5</sub>), 132.91 (*o*-C<sub>6</sub>H<sub>2</sub>Me<sub>3</sub>), 131.73 (*o*-C<sub>6</sub>H<sub>2</sub>Me<sub>3</sub>), 128.36 (2 *m*-C<sub>6</sub>H<sub>2</sub>Me<sub>3</sub>, overlapped with C<sub>6</sub>D<sub>5</sub>Br), 127.03 (C<sub>6</sub>H<sub>5</sub>), 126.85 (C<sub>6</sub>H<sub>5</sub>), 126.68 (C<sub>6</sub>H<sub>5</sub>), 126.52 (C<sub>6</sub>H<sub>5</sub>), 125.18 (4,5C-N<sub>2</sub>C<sub>3</sub>H<sub>2</sub>Mes, overlapped with C<sub>6</sub>D<sub>5</sub>Br), 122.92 (4,5C-N<sub>2</sub>C<sub>3</sub>H<sub>2</sub>Mes), 80.68 (CNCMe<sub>2</sub>CH<sub>2</sub>O), 78.95 (CNCMe<sub>2</sub>CH<sub>2</sub>O), 68.39 (CNCMe<sub>2</sub>CH<sub>2</sub>O), 66.94 (CNCMe<sub>2</sub>CH<sub>2</sub>O), 26.98 (CNCMe<sub>2</sub>CH<sub>2</sub>O), 26.43 (CNCMe<sub>2</sub>CH<sub>2</sub>O), 25.04 (CNCMe<sub>2</sub>CH<sub>2</sub>O), 23.21 (CNCMe<sub>2</sub>CH<sub>2</sub>O),

19.63 (*p*-C<sub>6</sub>H<sub>2</sub>Me<sub>3</sub>), 18.26 (*o*-C<sub>6</sub>H<sub>2</sub>Me<sub>3</sub>), 15.12 (*o*-C<sub>6</sub>H<sub>2</sub>Me<sub>3</sub>). <sup>11</sup>B NMR (bromobenzene-*d*<sub>5</sub>, 192 MHz): δ -7.9 (PhB(Ox<sup>Me2</sup>)(Ox<sup>Me2</sup>SiHPh)Im<sup>Mes</sup>), -25 (br, HB(C<sub>6</sub>F<sub>5</sub>)<sub>3</sub>). <sup>15</sup>N{<sup>1</sup>H} NMR (bromobenzene-*d*<sub>5</sub>, 61 MHz): δ -167.7 (CN(Rh)CMe<sub>2</sub>CH<sub>2</sub>O), -180.7 (N<sub>2</sub>C<sub>3</sub>H<sub>2</sub>Mes), -183.1 (N<sub>2</sub>C<sub>3</sub>H<sub>2</sub>Mes), -199.5 (CN(SiHPh)CMe<sub>2</sub>CH<sub>2</sub>O). <sup>19</sup>F NMR (bromobenzene-*d*<sub>5</sub>, 545 MHz): δ -132.08 (*o*-C<sub>6</sub>F<sub>5</sub>), -162.79 (*p*-C<sub>6</sub>F<sub>5</sub>), -165.72 (*m*-C<sub>6</sub>F<sub>5</sub>). <sup>29</sup>Si NMR (bromobenzene-*d*<sub>5</sub>, 119 MHz): δ 6.5 (<sup>1</sup>J<sub>RhSi</sub> = 42 Hz). IR (KBr, cm<sup>-1</sup>): 3398 w, 2972 w, 2928 w, 2859 w, 2386 w, 2162 w, 2076 s, 2016 m, 2000 br, 1652 m, 1639 m, 1560 m, 1508 s, 1464 s, 1373 m, 1301 m, 1274 m, 1209 m, 1184 m, 1162 m, 1110 s, 1075 s, 968 s, 852 m, 827 m, 750 w, 738 w, 705 w, 681 w, 639 w, 567 w. EIMS (positive ion mode): 707.2 M<sup>+</sup>, 679.2 M<sup>+</sup>-CO, 629.2 M<sup>+</sup>-C<sub>7</sub>H<sub>6</sub>O, 601.2 M<sup>+</sup>-SiC<sub>7</sub>H<sub>6</sub>O, 471.3 M<sup>+</sup>-RhSiC<sub>7</sub>H<sub>7</sub>O. EIMS (negative ion mode): 512.9 HB(C<sub>6</sub>F<sub>5</sub>)<sub>3</sub><sup>-</sup>. Anal. Calcd for C<sub>53</sub>H<sub>42</sub>B<sub>2</sub>F<sub>15</sub>N<sub>4</sub>O<sub>3</sub>RhSi: C, 52.16; H, 3.47; N, 4.59. Found: C, 51.45; H, 3.20; N, 4.55. Mp, 89-91 °C.

**Figure S1.** A <sup>1</sup>H NMR spectrum of **2** acquired in bromobenzene-*d*<sub>5</sub>. The acquisition window extended from -40 to 14 ppm, and no signals were detected in the region not shown.

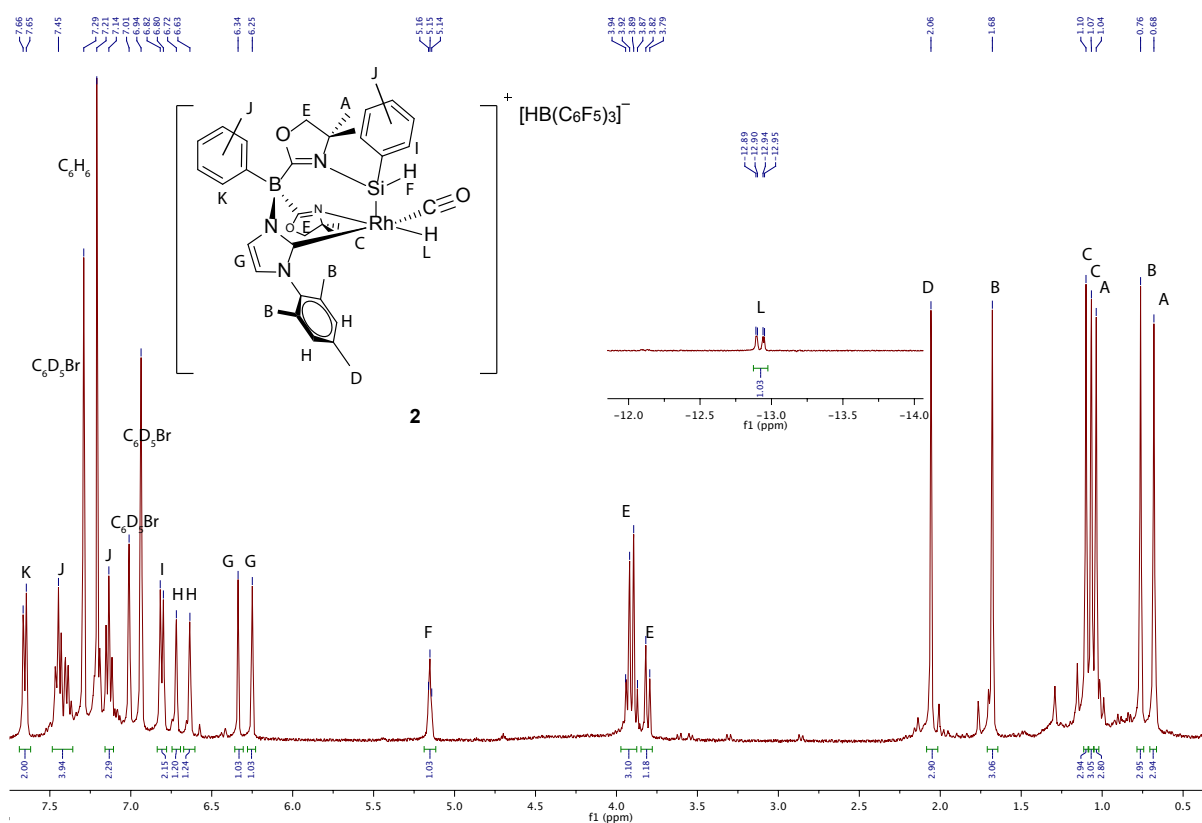

Figure S2.  $^{13}\text{C}\{^1\text{H}\}$  NMR spectrum of **2** acquired in bromobenzene- $d_5$ .

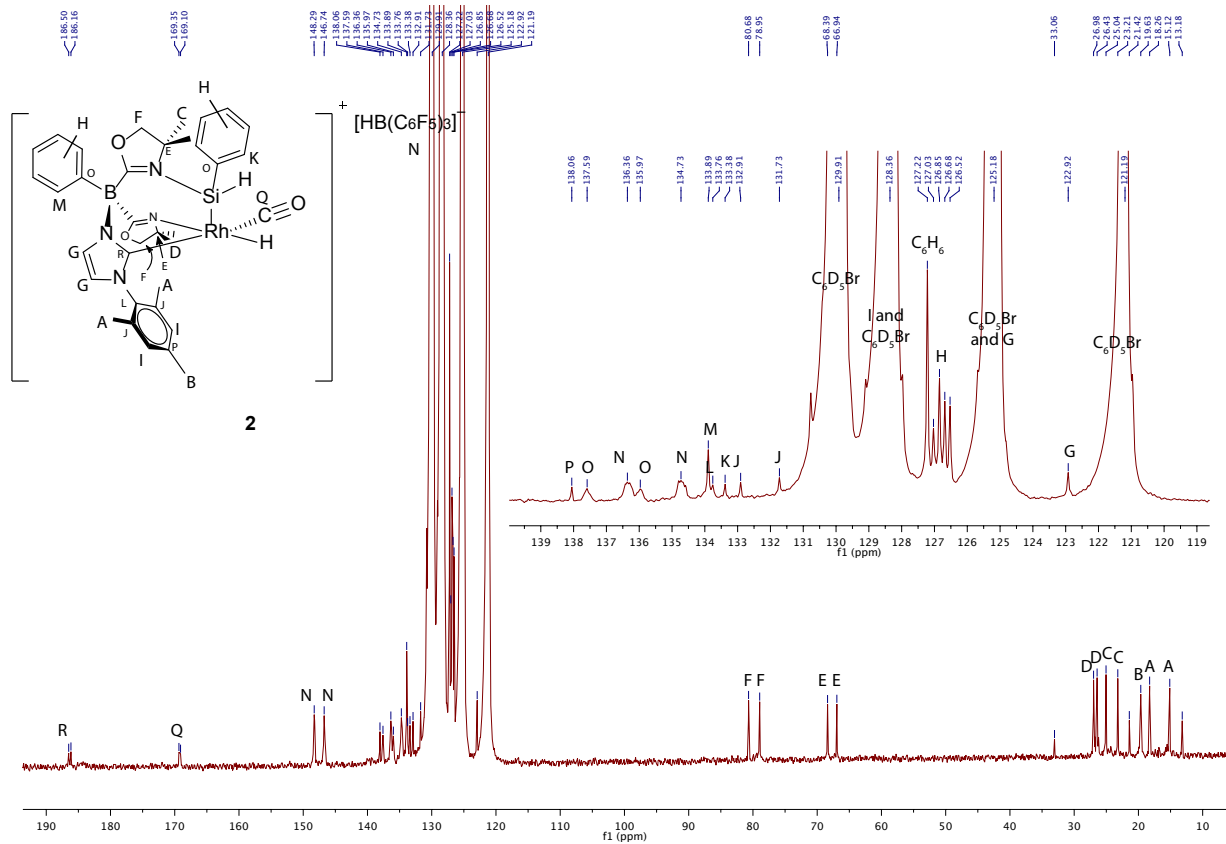

**Figure S3.**  $^1\text{H}$ - $^{15}\text{N}$  HMBC spectrum of **2** acquired in bromobenzene- $d_5$  on a Bruker Avance 700 spectrometer using a Bruker Z-gradient inverse TXI  $^1\text{H}/^{13}\text{C}/^{15}\text{N}$  5 mm cryoprobe. Inset: a  $^1\text{H}$ - $^{15}\text{N}$  HMBC experiment acquired on a Bruker Avance 600 spectrometer with an inverse BB probe. The F1 axis is the  $^{15}\text{N}$  dimension, and F2 is the  $^1\text{H}$  dimension. The spectrum is machine-calibrated to  $\text{NH}_3$  as the standard, and the reported chemical shift values are adjusted to the nitromethane scale. Crosspeaks at  $\sim 203$  ppm from minor contaminants in the above spectrum appeared at longer acquisition times required to observed N-Si-H correlations, and result from more efficient polarization transfer from oxazoline methyl groups to N than the two-bond correlation through silicon.

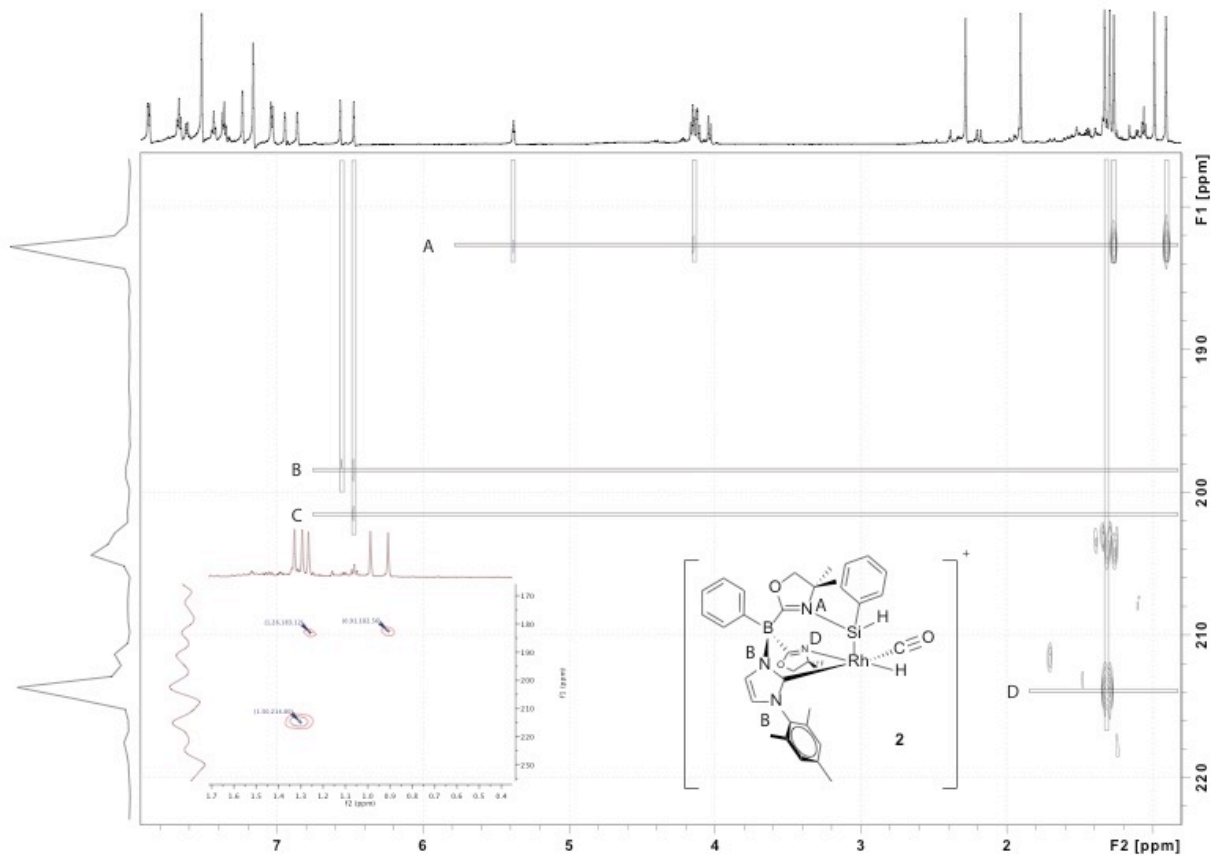

**Figure S4.** A  $^1\text{H}$ - $^{29}\text{Si}$  HSQC experiment on **2** acquired in bromobenzene- $d_5$  with tetrakis(trimethylsilyl)silane as an internal standard.

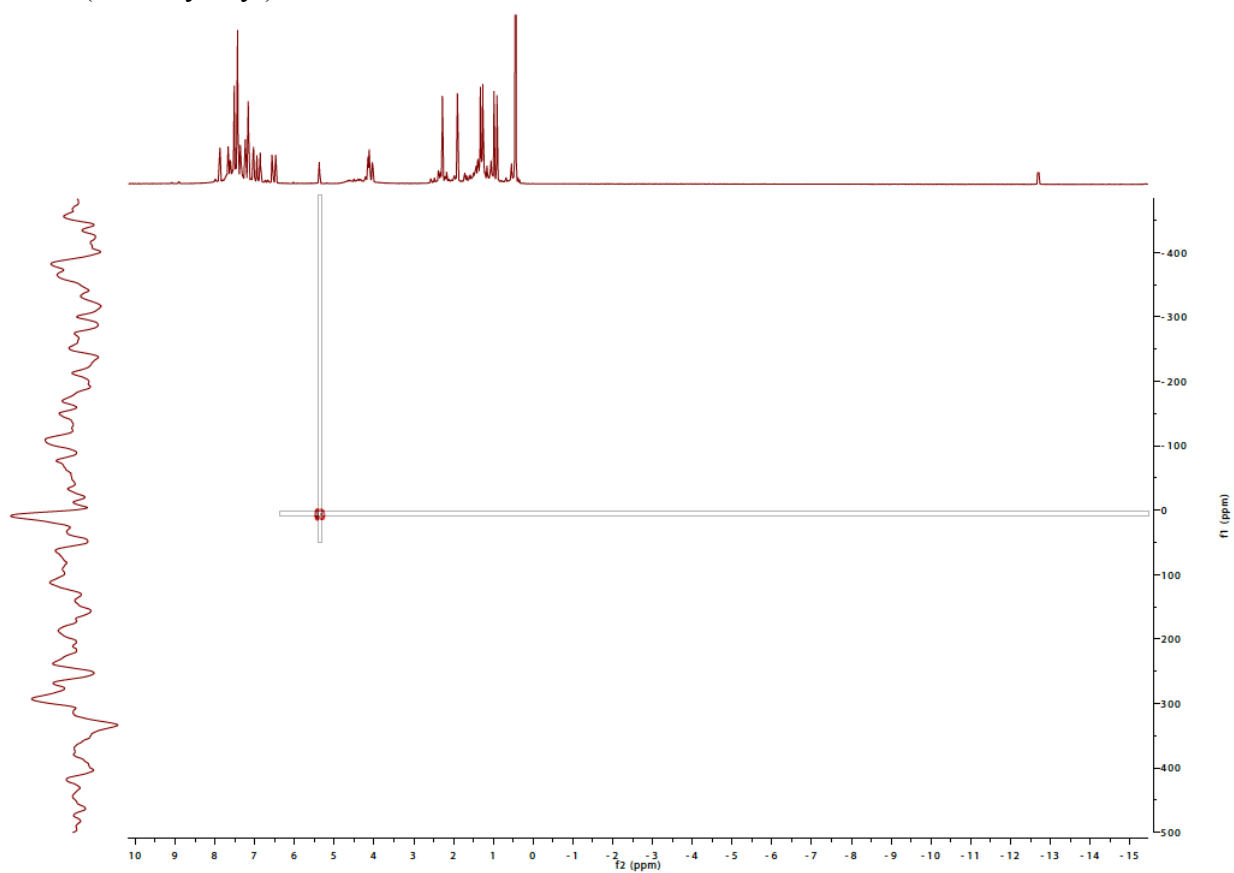

**Figure S5.**  $^{29}\text{Si}\{^1\text{H}\}$  INEPT spectrum showing the  $^1J_{\text{RhSi}}$  coupling. The upfield signal is from tetrakis(trimethylsilyl)silane, added as an internal standard.

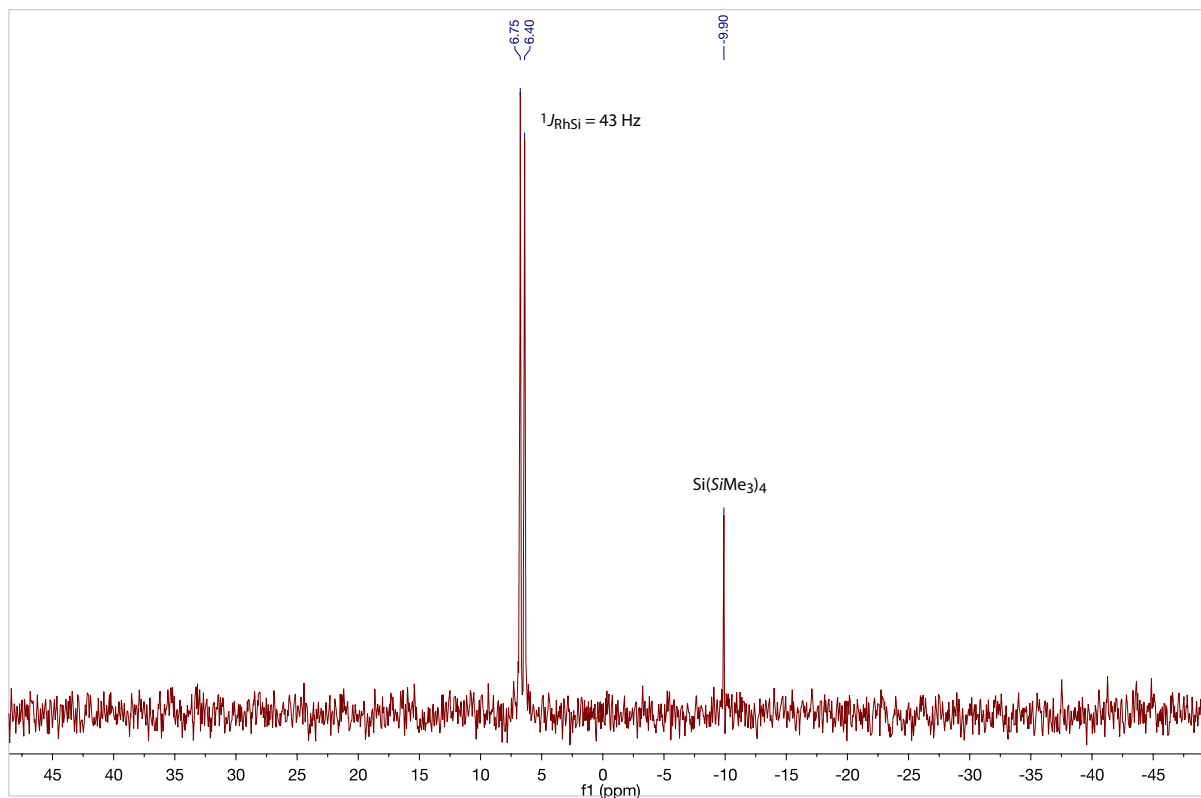

The  $^1\text{H} \rightarrow ^{29}\text{Si}$  cross-polarization magic angle spinning (CPMAS) and  $^1\text{H}$  MAS spectra of **2** were acquired on a 600 MHz Varian spectrometer equipped with a 1.6-mm FastMAS<sup>TM</sup> T3 probe. The rotor was packed in a glove box to provide protection from air and moisture contamination and was spun using dry nitrogen gas. The experimental parameters are given in figure captions, where  $\nu_R$  is the MAS rate,  $\nu_{\text{RF}}(\text{X})$  is the magnitude of the RF magnetic field applied to X spins,  $\tau_{\text{CP}}$  is the cross-polarization time,  $\tau_{\text{RD}}$  is the recycle delay, and NS is the number of scans.

**Figure S6.** The  $^1\text{H} \rightarrow ^{29}\text{Si}$  CPMAS spectrum of **2** acquired using the following experimental parameters:  $\nu_R = 20$  kHz,  $\nu_{\text{RF}}(\text{H}) = 100$  kHz during the excitation pulse,  $\nu_{\text{RF}}(\text{H}) = 50$  kHz during CP,  $\nu_{\text{RF}}(\text{H}) = 80$  kHz during TPPM heteronuclear decoupling,  $\nu_{\text{RF}}(\text{Si}) = 70$  kHz during CP,  $\tau_{\text{CP}} = 1$  ms,  $\tau_{\text{RD}} = 3$  s, and NS = 8000.

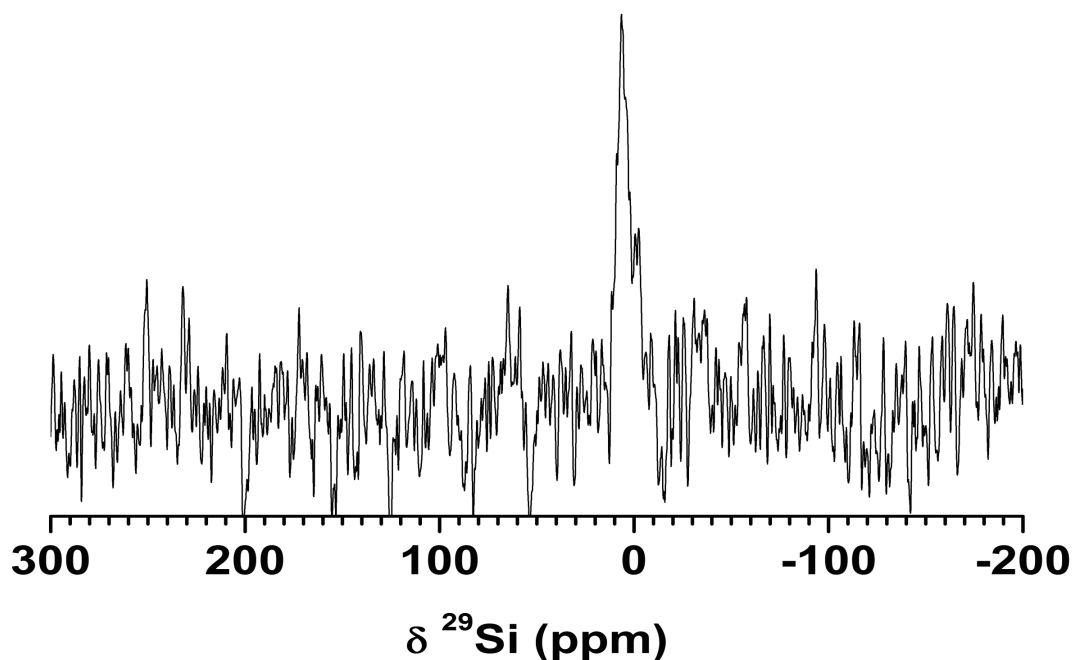



**Figure S7.** The  $^1\text{H}$  MAS spectrum of **2** acquired using the following experimental parameters:  $\nu_R = 20$  kHz,  $\nu_{\text{RF}}(\text{H}) = 100$  kHz,  $\tau_{\text{RD}} = 3$  s, and  $\text{NS} = 4$ .

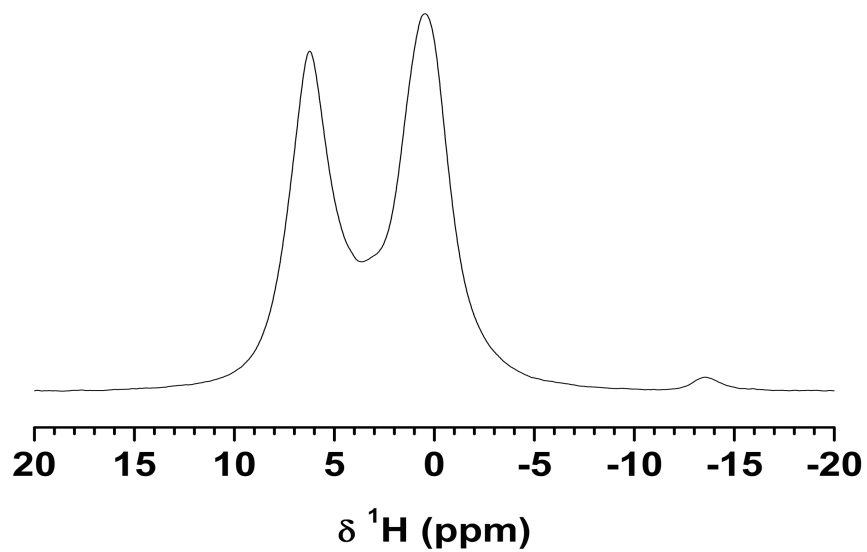

**Figure S8.**  $^{19}\text{F}$  NMR spectrum of **2** acquired in bromobenzene- $d_5$ .

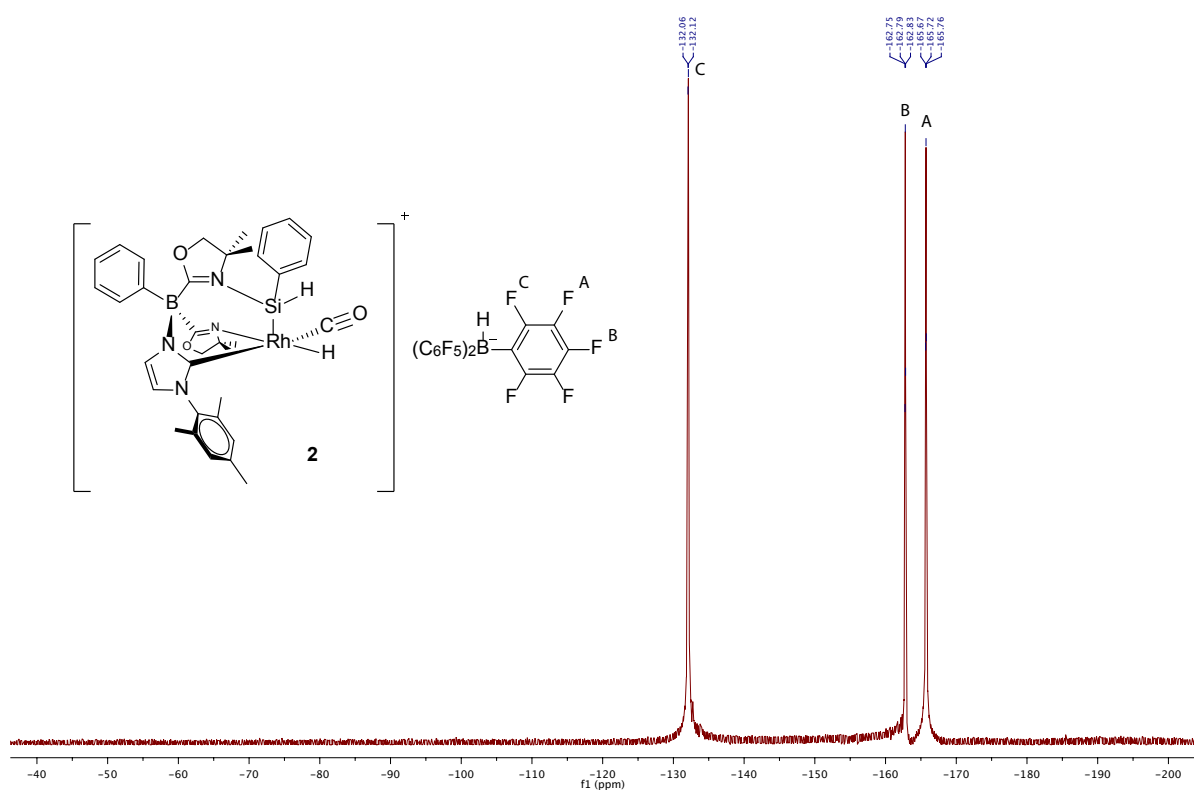

**Figure S9.**  $^{11}\text{B}$  NMR spectrum of **2** acquired in bromobenzene- $d_5$ .

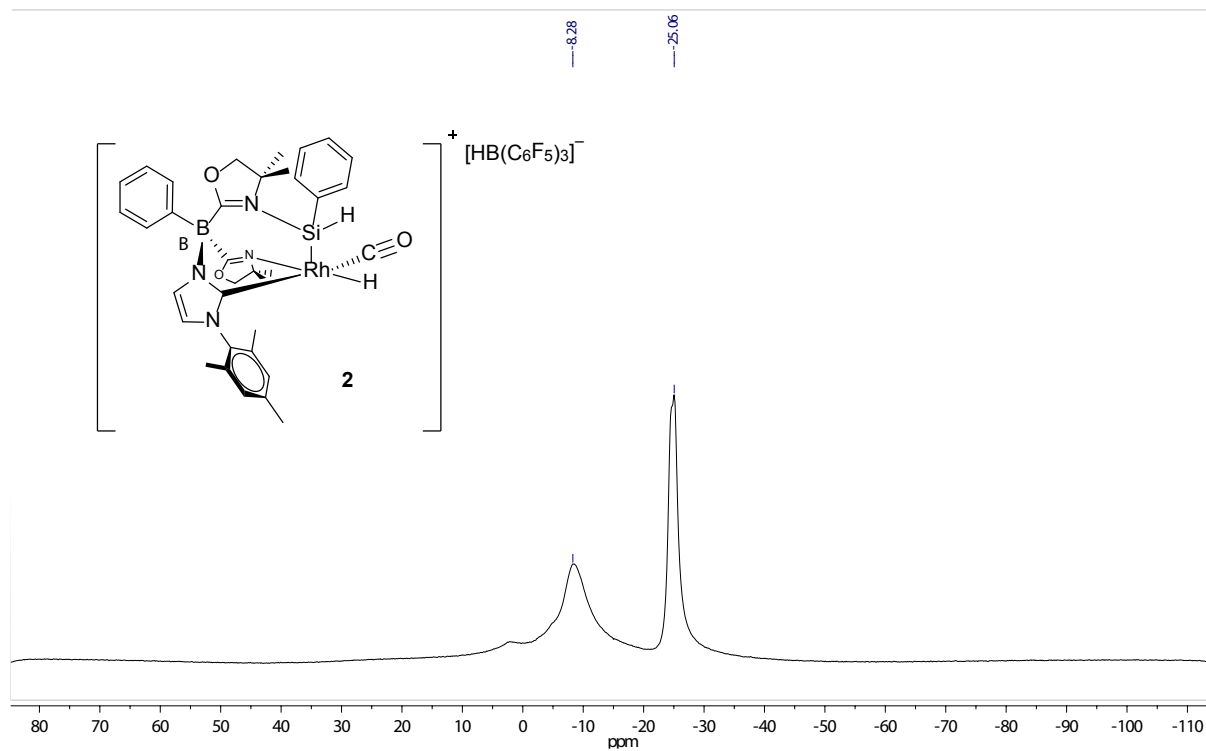

**Figure S10.** High resolution mass spectrum of **2** acquired in bromobenzene and positive ion mode.

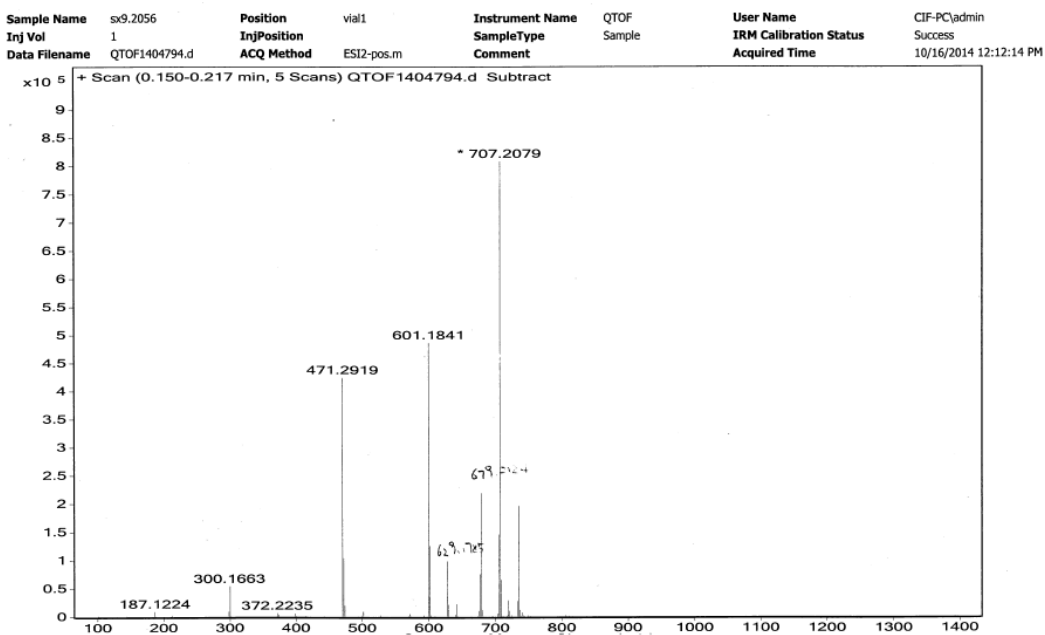

**Figure S11.** High resolution mass spectrum of **2** acquired in bromobenzene and negative ion mode.

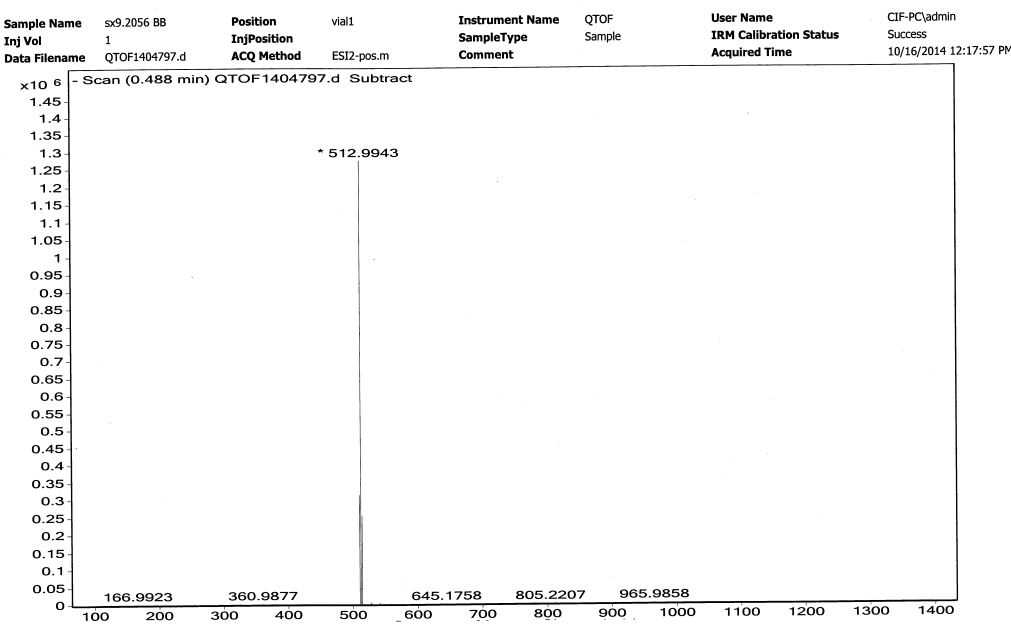

### **Description of Catalytic Experiments.**

**exo-2-Methoxybicyclo[2.2.1]heptane.** A methylene chloride solution of **2** (0.0150 g, 0.0123 mmol, 10 mL) was added to a mixture of *exo*-2-norbornylformate (1.60 mL, 12.0 mmol) and phenylsilane (3.10 mL, 25.1 mmol). The solution was stirred at room temperature for 24 h and then filtered through a short plug of celite (5 mL). The celite was washed with methylene chloride (2 × 5 mL), the clear and colorless filtrates were combined, and the mixture was purified by distillation. The product was distilled at 167 °C (760 mmHg) as a colorless liquid (0.740 g, 5.86 mmol, 48.8%). The experimental <sup>1</sup>H and <sup>13</sup>C{<sup>1</sup>H} NMR spectra matched those reported in the literature.<sup>3</sup> <sup>1</sup>H NMR (chloroform-*d*, 600 MHz): δ 3.27 (s, 3 H, OMe), 3.25 (m, 1 H, 2H-C<sub>7</sub>H<sub>9</sub>), 2.34 (m, 1 H, 4H-C<sub>7</sub>H<sub>9</sub>), 2.24 (m, 1 H, 1H-C<sub>7</sub>H<sub>9</sub>), 1.56 (m, 2 H, 6,7H-C<sub>7</sub>H<sub>9</sub>), 1.50 (d, 1 H, 3H-C<sub>7</sub>H<sub>9</sub>), 1.43 (m, 1 H, 5H-C<sub>7</sub>H<sub>9</sub>), 1.35 (m, 1 H, 7H-C<sub>7</sub>H<sub>9</sub>), 1.09 (m, 1 H, 3H-C<sub>7</sub>H<sub>9</sub>), 1.05 (m, 1 H, 5H-C<sub>7</sub>H<sub>9</sub>), 0.98 (m, 1 H, 6H-C<sub>7</sub>H<sub>9</sub>). <sup>13</sup>C{<sup>1</sup>H} NMR (chloroform-*d*, 150 MHz): δ 84.39 (2C-C<sub>6</sub>H<sub>9</sub>), 56.01 (OMe), 40.06 (4C-C<sub>7</sub>H<sub>9</sub>), 39.49 (7C-C<sub>7</sub>H<sub>9</sub>), 35.30 (1C-C<sub>7</sub>H<sub>9</sub>), 34.90 (3C-C<sub>7</sub>H<sub>9</sub>), 28.67 (5C-C<sub>7</sub>H<sub>9</sub>), 24.77 (6C-C<sub>7</sub>H<sub>9</sub>). EIMS: C<sub>8</sub>H<sub>14</sub>O m/z 126 (M<sup>+</sup>).

**Diethyl ether.** A chloroform-*d* solution of **2** (0.0002 g, 0.000164 mmol, 0.5 mL) was added to a mixture of ethyl acetate (16.0 μL, 0.164 mmol), phenylsilane (40.5 μL, 0.328 mmol), and Si(SiMe<sub>3</sub>)<sub>4</sub> (0.314 M) as an internal standard. The reaction's progress was monitored with <sup>1</sup>H NMR spectroscopy, and all of the ethyl acetate was consumed after 0.5 h to give the product in 70.0% yield. The NMR spectra matched those acquired using an authentic sample of diethyl ether. <sup>1</sup>H NMR (chloroform-*d*, 600 MHz): δ 3.51 (q, <sup>3</sup>J<sub>HH</sub> = 7.2 Hz, 4 H, CH<sub>2</sub>CH<sub>3</sub>), 1.24 (t, <sup>3</sup>J<sub>HH</sub> = 7.2 Hz, 6 H, CH<sub>2</sub>CH<sub>3</sub>).

**1-Bromo-6-ethoxyhexane.** A chloroform solution of **2** (0.0150 g, 0.0123 mmol) was added to ethyl 6-bromohexanoate (0.218 mL, 1.23 mmol) and phenylsilane (0.310 mL, 2.51 mmol). The solution was heated to 80 °C for 72 h and filtered through a short plug of celite (5 mL). The celite was extracted with chloroform (2 × 3 mL), the colorless filtrates were combined, and the mixture was separated by distillation. The product was distilled at 101 °C (10 mmHg) as a colorless liquid (0.193 g, 0.923 mmol, 75.0%). The experimental spectra matched the literature report.<sup>4</sup> <sup>1</sup>H NMR (chloroform-*d*, 600 MHz): δ 3.48 (q, <sup>3</sup>J<sub>HH</sub> = 6.6 Hz, 2 H, OCH<sub>2</sub>CH<sub>3</sub>), 3.42 (m, 4 H, BrCH<sub>2</sub>(CH<sub>2</sub>)<sub>4</sub>CH<sub>2</sub>OEt), 1.88 (m, 2 H, BrCH<sub>2</sub>CH<sub>2</sub>(CH<sub>2</sub>)<sub>4</sub>OEt), 1.57 (m, 2 H, Br(CH<sub>2</sub>)<sub>4</sub>CH<sub>2</sub>CH<sub>2</sub>OEt), 1.47 (m, 2 H, Br(CH<sub>2</sub>)<sub>3</sub>CH<sub>2</sub>(CH<sub>2</sub>)<sub>2</sub>OEt), 1.39 (m, 2 H,

Br(CH<sub>2</sub>)<sub>2</sub>CH<sub>2</sub>(CH<sub>2</sub>)<sub>3</sub>OEt), 1.21 (t, <sup>3</sup>J<sub>HH</sub> = 6.6 Hz, 3 H, OCH<sub>2</sub>CH<sub>3</sub>). <sup>13</sup>C{<sup>1</sup>H} NMR (chloroform-*d*, 150 MHz): δ 70.63 (Br(CH<sub>2</sub>)<sub>5</sub>CH<sub>2</sub>OEt), 66.27 (OCH<sub>2</sub>CH<sub>3</sub>), 34.05 (BrCH<sub>2</sub>(CH<sub>2</sub>)<sub>5</sub>OEt), 32.90 (BrCH<sub>2</sub>CH<sub>2</sub>(CH<sub>2</sub>)<sub>4</sub>OEt), 29.78 (Br(CH<sub>2</sub>)<sub>4</sub>CH<sub>2</sub>CH<sub>2</sub>OEt), 28.18 (Br(CH<sub>2</sub>)<sub>3</sub>CH<sub>2</sub>(CH<sub>2</sub>)<sub>2</sub>OEt), 25.59 (Br(CH<sub>2</sub>)<sub>2</sub>CH<sub>2</sub>(CH<sub>2</sub>)<sub>3</sub>OEt), 15.38 (OCH<sub>2</sub>CH<sub>3</sub>). EIMS: C<sub>18</sub>H<sub>17</sub>BrO m/z 209 (M<sup>+</sup>).

**2-(2-Ethoxyethyl)thiophene.** A 3 mL chloroform solution of **2** (0.0150 g, 0.0123 mmol) was added to ethyl 2-thiopheneacetate (0.184 mL, 1.23 mmol) and phenylsilane (3.10 mL, 25.1 mmol). The reaction mixture was heated to 80 °C for 24 h and filtered through a short plug of celite (5 mL). The celite was extracted with chloroform (2 × 3 mL), the colorless filtrates were combined, and the mixture was separated by distillation. The product distilled at 69 °C (10 mmHg) as a colorless liquid (0.0958 g, 0.613 mmol, 49.8%). The spectra of the isolated material matched the literature report.<sup>5</sup> <sup>1</sup>H NMR (chloroform-*d*, 600 MHz): δ 7.15 (d, <sup>3</sup>J<sub>HH</sub> = 4.8 Hz, 1 H, 5H-C<sub>4</sub>H<sub>3</sub>S), 6.94 (t, <sup>3</sup>J<sub>HH</sub> = 4.2 Hz, 1 H, 4H-C<sub>4</sub>H<sub>3</sub>S), 6.86 (d, <sup>3</sup>J<sub>HH</sub> = 3.0 Hz, 1 H, <sup>3</sup>J<sub>HH</sub> = 3.0 Hz, 3H-C<sub>4</sub>H<sub>3</sub>S), 3.68 (t, <sup>3</sup>J<sub>HH</sub> = 7.2 Hz, 2 H, CH<sub>2</sub>CH<sub>2</sub>OEt), 3.54 (q, <sup>3</sup>J<sub>HH</sub> = 7.2 Hz, 2 H, OCH<sub>2</sub>CH<sub>3</sub>), 3.11 (t, <sup>3</sup>J<sub>HH</sub> = 7.2 Hz, 2 H, CH<sub>2</sub>CH<sub>2</sub>OEt), 1.24 (t, <sup>3</sup>J<sub>HH</sub> = 7.2 Hz, 3 H, OCH<sub>2</sub>CH<sub>3</sub>). <sup>13</sup>C{<sup>1</sup>H} NMR (chloroform-*d*, 150 MHz): δ 141.52 (2C-C<sub>4</sub>H<sub>3</sub>S), 126.78 (3C-C<sub>4</sub>H<sub>3</sub>S), 125.15 (4C-C<sub>4</sub>H<sub>3</sub>S), 123.70 (5C-C<sub>4</sub>H<sub>3</sub>S), 71.31 (CH<sub>2</sub>CH<sub>2</sub>OEt), 66.44 (OCH<sub>2</sub>CH<sub>3</sub>), 30.67 (CH<sub>2</sub>CH<sub>2</sub>OEt), 15.32 (OCH<sub>2</sub>CH<sub>3</sub>). EIMS: C<sub>18</sub>H<sub>12</sub>OS m/z 156 (M<sup>+</sup>).

**(Z)-1-Methoxyoctadec-9-ene.** Compound **2** (0.0150 g, 0.0123 mmol) dissolved in chloroform (3 mL) was added to methyl oleate (0.417 mL, 1.23 mmol) and phenylsilane (0.310 mL, 2.51 mmol). The solution was heated to 60 °C for 72 h and filtered through a short plug of celite (5 mL). The celite was extracted with chloroform (3 mL × 2), the colorless filtrates were combined, and the mixture was separated by distillation. The product distilled at 200 °C (0.1 mmHg) as a colorless liquid (0.215 g, 0.761 mmol, 61.9%) to give a substance with NMR spectroscopic properties that matched the literature report.<sup>6</sup> <sup>1</sup>H NMR (chloroform-*d*, 600 MHz): δ 5.36 (m, 2 H, CH=CH), 3.37 (t, <sup>3</sup>J<sub>HH</sub> = 6.6 Hz, 2 H, CH<sub>2</sub>OMe), 3.34 (s, 3 H, OMe), 2.03 (m, 4 H, CH<sub>2</sub>CH=CHCH<sub>2</sub>), 1.57 (m, 2 H, CH<sub>2</sub>CH<sub>2</sub>OMe), 1.3 (br, 22 H, CH<sub>3</sub>(CH<sub>2</sub>)<sub>6</sub>CH<sub>2</sub>CH=CHCH<sub>2</sub>(CH<sub>2</sub>)<sub>5</sub>CH<sub>2</sub>CH<sub>2</sub>OMe), 0.89 (t, <sup>3</sup>J<sub>HH</sub> = 6.6 Hz, 3 H, CH<sub>3</sub>(CH<sub>2</sub>)<sub>7</sub>CH=CH(CH<sub>2</sub>)<sub>8</sub>OMe). <sup>13</sup>C{<sup>1</sup>H} NMR (chloroform-*d*, 150 MHz): δ 130.08 (*cis*-CH=CH), 130.00 (*cis*-CH=CH), 73.13 (CH<sub>2</sub>OMe), 58.69 (OMe), 32.07 (CH<sub>3</sub>CH<sub>2</sub>CH<sub>2</sub>), 29.93-29.33 (CH<sub>3</sub>CH<sub>2</sub>CH<sub>2</sub>(CH<sub>2</sub>)<sub>4</sub>CH<sub>2</sub>CH=CHCH<sub>2</sub>(CH<sub>2</sub>)<sub>6</sub>CH<sub>2</sub>OMe), 27.37 (CH<sub>2</sub>CH=CHCH<sub>2</sub>), 26.30

(CH<sub>2</sub>CH=CHCH<sub>2</sub>), 22.84 (CH<sub>3</sub>CH<sub>2</sub>(CH<sub>2</sub>)<sub>6</sub>CH=CH(CH<sub>2</sub>)<sub>8</sub>OMe), 14.27  
(CH<sub>3</sub>(CH<sub>2</sub>)<sub>7</sub>CH=CH(CH<sub>2</sub>)<sub>8</sub>OMe). EIMS: C<sub>19</sub>H<sub>38</sub>O m/z 283 (M<sup>+</sup>).

**(E)-5-Methoxypent-2-ene.** A chloroform-*d* solution of **2** (0.0010 g, 0.000819 mmol) was added to methyl *trans*-3-pentenoate (10.0 μL, 0.0815 mmol), phenylsilane (20.2 μL, 0.163 mmol), and Si(SiMe<sub>3</sub>)<sub>4</sub> (0.314 M) as an internal standard. The solution was heated to 80 °C, and the conversion of ester to ether was monitored with <sup>1</sup>H NMR spectroscopy. The ester was completely consumed after 24 h to give the product in 64.9% yield.<sup>7</sup> <sup>1</sup>H NMR (chloroform-*d*, 600 MHz): δ 5.48-5.53 (m, 2 H, CH=CH), 3.42 (t, <sup>3</sup>J<sub>HH</sub> = 10.2 Hz, 2 H, CH<sub>2</sub>OMe), 3.37 (s, 3 H, OMe), 2.31 (m, 2 H, CH<sub>2</sub>CH<sub>2</sub>OMe), 1.69 (m, 3 H, CH<sub>3</sub>CH=CH).

**Tetrahydrofuran.** A methylene chloride solution (3 mL) of **2** (0.0150 g, 0.0123 mmol) was added to γ-butyrolactone (0.100 mL, 1.30 mmol) and phenylsilane (0.310 mL, 2.51 mmol). The resulting mixture was stirred at room temperature for 8 h and filtered through a short plug of celite (5 mL). The product was distilled at 65 °C (760 mmHg) to give a sample of THF (0.0520 g, 0.721 mmol, 55.4%) that matched authentic samples of tetrahydrofuran by <sup>1</sup>H and <sup>13</sup>C{<sup>1</sup>H} NMR spectroscopy. <sup>1</sup>H NMR (chloroform-*d*, 600 MHz): δ 3.7 (br, 4 H, 2,5H-C<sub>4</sub>H<sub>8</sub>O), 1.8 (br, 4 H, 3,4H-C<sub>4</sub>H<sub>8</sub>O). <sup>13</sup>C{<sup>1</sup>H} NMR (chloroform-*d*, 150 MHz): δ 68.08 (2,5C-C<sub>4</sub>H<sub>8</sub>O), 25.73 (3,4C-C<sub>4</sub>H<sub>8</sub>O). EIMS: C<sub>4</sub>H<sub>8</sub>O m/z 72 (M<sup>+</sup>).

**1,1,1-Trifluoro-2-(2,2,2-trifluoroethoxy)ethane.** A chloroform-*d* solution (0.5 mL) of **2** (0.0010 g, 0.000819 mmol) was added to trifluoroacetic anhydride (5.7 μL, 0.041 mmol), phenylsilane (20.2 μL, 0.163 mmol), and Si(SiMe<sub>3</sub>)<sub>4</sub> (0.314 M) as an internal standard. The reaction progress was monitored using <sup>1</sup>H NMR spectroscopy which indicated the anhydride was consumed after 6 h and provides the ether in 50.1% yield.<sup>8</sup> <sup>1</sup>H NMR (chloroform-*d*, 600 MHz): δ 3.84 (q, <sup>3</sup>J<sub>HF</sub> = 8.0 Hz, CH<sub>2</sub>). <sup>13</sup>C{<sup>1</sup>H} NMR (chloroform-*d*, 150 MHz): δ 124.10 (q, J<sub>CF</sub> = 277.5 Hz, CH<sub>2</sub>CF<sub>3</sub>), 63.51 (q, J<sub>CF</sub> = 36.0 Hz, CH<sub>2</sub>CF<sub>3</sub>). <sup>19</sup>F NMR (chloroform-*d*, 376 MHz): δ -76.36 (t, <sup>3</sup>J<sub>HF</sub> = 8.6 Hz, CF<sub>3</sub>).

**Trimethylamine.** A chloroform-*d* solution (0.5 mL) of **2** (0.0010 g, 0.000819 mmol) was added to *N,N*-dimethylformamide (6.3 μL, 0.0814 mmol), phenylsilane (20.2 μL, 0.163 mmol), and Si(SiMe<sub>3</sub>)<sub>4</sub> (0.314 M) as an internal standard. The solution was heated to 80 °C, and the progress was monitored through <sup>1</sup>H NMR. All amide was consumed after 3 h to give 85.4% yield of

NMe<sub>3</sub>. The spectra matched the literature report.<sup>9</sup> <sup>1</sup>H NMR (chloroform-*d*, 600 MHz): δ 2.24 (s, Me). <sup>13</sup>C{<sup>1</sup>H} NMR (chloroform-*d*, 150 MHz): δ 47.84 (Me).

***N,N*-Dimethylbenzylammonium chloride.** A chloroform solution (3 mL) of **2** (0.0150 g, 0.0123 mmol) was added to *N,N*-dimethylbenzamide (0.183 g, 1.23 mmol) and phenylsilane (0.310 mL, 2.51 mmol). The solution was heated to 80 °C for 24 h and filtered through a short plug of celite (5 mL). The celite was washed with diethyl ether (2 × 3 mL), the extracts were combined, and a diethyl ether solution of hydrochloric acid (2.0 M, 5 mL) was added. The solvent was evaporated from the slightly cloudy solution, and the residual white solid was washed with diethyl ether (3 × 5 mL) and dried under vacuum to give the product as a white solid (0.168 g, 0.979 mmol, 79.6%). The NMR spectra of this material matched the literature report.<sup>10</sup> <sup>1</sup>H NMR (chloroform-*d*, 600 MHz): δ 12.8 (br, 1 H, NH), 7.6 (br, 2 H, C<sub>6</sub>H<sub>5</sub>), 7.5 (br, 3 H, C<sub>6</sub>H<sub>5</sub>), 4.17 (s, 2 H, CH<sub>2</sub>Ph), 2.75 (s, 6 H, Me). <sup>13</sup>C{<sup>1</sup>H} NMR (chloroform-*d*, 150 MHz): δ 131.20 (C<sub>6</sub>H<sub>5</sub>), 130.41 (C<sub>6</sub>H<sub>5</sub>), 129.59 (C<sub>6</sub>H<sub>5</sub>), 128.51 (C<sub>6</sub>H<sub>5</sub>), 61.39 (CH<sub>2</sub>Ph), 42.29 (Me). EIMS: C<sub>9</sub>H<sub>14</sub>N m/z 135 (M<sup>+</sup>-Cl). For *N,N*-dimethyl-1-phenylmethanamine, a chloroform-*d* solution (0.5 mL) of **2** (0.0010 g, 0.000819 mmol) was added to *N,N*-dimethylbenzamide (0.0122 g, 0.0818 mmol), phenylsilane (20.2 μL, 0.163 mmol), and Si(SiMe<sub>3</sub>)<sub>4</sub> (0.314 M) as an internal standard. The solution was heated to 80 °C, and the reaction progress was monitored using <sup>1</sup>H NMR spectroscopy which indicated the amide was consumed after 24 h (86.3%). <sup>1</sup>H NMR (chloroform-*d*, 600 MHz): δ 7.31-7.20 (m, 5 H, C<sub>6</sub>H<sub>5</sub>), 3.37 (s, 2 H, CH<sub>2</sub>), 2.20 (s, 6 H, Me).

**Ethylbenzene.** A methylene chloride solution (3 mL) of **2** (0.0150 g, 0.0123 mmol) was added to a mixture of acetophenone (0.140 mL, 1.20 mmol) and phenylsilane (0.310 mL, 2.51 mmol). The solution was stirred at room temperature for 7 h and filtered through a short plug of celite (5 mL), which was extracted with methylene chloride (2 × 3 mL). The colorless filtrates were combined, and the mixture was separated by distillation. The product was distilled at 132 °C (760 mmHg) as a colorless liquid (0.0739 g, 0.696 mmol, 58.0%). The spectra matched those acquired from an authentic sample of ethylbenzene. <sup>1</sup>H NMR (chloroform-*d*, 600 MHz): δ 7.34 (m, 2 H, C<sub>6</sub>H<sub>5</sub>), 7.23 (m, 3 H, C<sub>6</sub>H<sub>5</sub>), 2.70 (m, 2 H, CH<sub>2</sub>CH<sub>3</sub>), 1.30 (m, 3 H, CH<sub>2</sub>CH<sub>3</sub>). <sup>13</sup>C{<sup>1</sup>H} NMR (chloroform-*d*, 150 MHz): δ 144.38 (*ipso*-C<sub>6</sub>H<sub>5</sub>), 128.44 (*m*-C<sub>6</sub>H<sub>5</sub>), 127.99 (*o*-C<sub>6</sub>H<sub>5</sub>), 125.72 (*p*-C<sub>6</sub>H<sub>5</sub>), 29.03 (CH<sub>2</sub>CH<sub>3</sub>), 15.76 (CH<sub>2</sub>CH<sub>3</sub>). EIMS: C<sub>8</sub>H<sub>10</sub> m/z 106 (M<sup>+</sup>).

**2-Ethyl-1,3-dimethoxybenzene.** A methylene chloride solution (3 mL) of **2** (0.0150 g, 0.0123 mmol) was added to a mixture of 2',6'-dimethoxyacetophenone (0.220 g, 1.22 mmol) and phenylsilane (3.10 mL, 25.1 mmol). The reaction mixture was stirred at room temperature for 24 h and then was filtered through a short plug of celite (5 mL). The celite was extracted with methylene chloride (2 × 3 mL), the colorless filtrates were combined, and the product was isolated through column chromatography (ethyl acetate:hexane = 1:9,  $R_f = 0.85$ ) as a white solid (0.112 g, 0.674 mmol, 55.2%). The NMR spectra of the isolated material matched the literature report.<sup>11</sup> <sup>1</sup>H NMR (chloroform-*d*, 600 MHz):  $\delta$  7.13 (t,  $^3J_{\text{HH}} = 8.4$  Hz, 1 H, 5H-C<sub>6</sub>H<sub>3</sub>), 6.56 (d,  $^3J_{\text{HH}} = 8.4$  Hz, 2 H, 4,6H-C<sub>6</sub>H<sub>3</sub>), 3.83 (s, 6 H, OMe), 2.68 (q,  $^3J_{\text{HH}} = 7.2$  Hz, 2 H, CH<sub>2</sub>CH<sub>3</sub>), 1.10 (t,  $^3J_{\text{HH}} = 7.2$  Hz, 3 H, CH<sub>2</sub>CH<sub>3</sub>). <sup>13</sup>C{<sup>1</sup>H} NMR (chloroform-*d*, 150 MHz):  $\delta$  158.27 (1,3C-C<sub>6</sub>H<sub>3</sub>), 126.55 (5C-C<sub>6</sub>H<sub>3</sub>), 121.07 (2C-C<sub>6</sub>H<sub>3</sub>), 103.91 (4,6-C<sub>6</sub>H<sub>3</sub>), 55.88 (OMe), 16.43 (CH<sub>2</sub>CH<sub>3</sub>), 13.93 (CH<sub>2</sub>CH<sub>3</sub>). EIMS: C<sub>10</sub>H<sub>14</sub>O<sub>2</sub> *m/z* 166 (M<sup>+</sup>).

**1,3,5-Trimethoxy-2-methylbenzene.** A methylene chloride solution of cationic rhodium complex **1** (0.0150 g, 0.0123 mmol, 3 mL) was added to 2,4,6-trimethoxybenzaldehyde (0.241 g, 1.23 mmol) and phenylsilane (0.310 mL, 2.51 mmol). The solution was stirred at room temperature for 7 h and filtered through a short plug of celite (5 mL). The celite was washed with methylene chloride (2 × 3 mL), the colorless filtrates were combined, and the mixture was purified by distillation. The product was distilled at 74 °C (0.1 mmHg) as a colorless liquid (0.107 g, 0.587 mmol, 47.8%). The spectra matched the literature report.<sup>12</sup> <sup>1</sup>H NMR (chloroform-*d*, 600 MHz):  $\delta$  6.15 (s, 2 H, C<sub>6</sub>H<sub>2</sub>), 3.82 (s, 9 H, OMe), 2.03 (s, 3 H, Me). <sup>13</sup>C{<sup>1</sup>H} NMR (chloroform-*d*, 150 MHz):  $\delta$  159.07 (5C-C<sub>6</sub>H<sub>2</sub>), 158.95 (1,3C-C<sub>6</sub>H<sub>2</sub>), 106.94 (2C-C<sub>6</sub>H<sub>2</sub>), 90.68 (4,6C-C<sub>6</sub>H<sub>2</sub>), 55.86 (1,3-OMe), 55.52 (5-OMe), 7.80 (Me). EIMS: C<sub>10</sub>H<sub>14</sub>O<sub>3</sub> *m/z* 182 (M<sup>+</sup>).

**1,3-Dimethoxy-2-methylbenzene.** A chloroform-*d* solution (0.5 mL) of **2** (0.0010 g, 0.000819 mmol) was added to 2,6-dimethoxybenzaldehyde (0.0136 g, 0.0818 mmol), phenylsilane (20.2  $\mu$ L, 0.163 mmol), and Si(SiMe<sub>3</sub>)<sub>4</sub> (0.314 M) as an internal standard. The progress was monitored through <sup>1</sup>H NMR, and all aldehyde was consumed after 4 h to give the hydrocarbon in 77% yield. The products spectra matched the literature report.<sup>11</sup> <sup>1</sup>H NMR (chloroform-*d*, 600 MHz):  $\delta$  7.15 (t,  $^3J_{\text{HH}} = 8.4$  Hz, 1 H, 5H-C<sub>6</sub>H<sub>3</sub>), 6.57 (d,  $^3J_{\text{HH}} = 8.4$  Hz, 2 H, 4,6H-C<sub>6</sub>H<sub>3</sub>), 3.85 (s, 6 H, OMe), 2.14 (s, 3 H, Me). <sup>13</sup>C NMR (chloroform-*d*, 150 MHz):  $\delta$  158.53 (1,3C-C<sub>6</sub>H<sub>3</sub>), 128.41



(5C-C<sub>6</sub>H<sub>3</sub>), 114.67 (2C-C<sub>6</sub>H<sub>3</sub>), 103.67 (4,6C-C<sub>6</sub>H<sub>3</sub>), 55.86 (OMe), 8.27 (Me). EIMS: C<sub>9</sub>H<sub>12</sub>O<sub>2</sub> m/z 152 (M<sup>+</sup>).

**Computational Details.** Structure optimizations were performed in TURBOMOLE<sup>13</sup> using B3LYP<sup>14</sup> density functional theory. The Stuttgart 1997 relativistic small core basis set plus effective core potential (ECP)<sup>15</sup> was used for Rh, and the 6-311G(d,p) basis set<sup>16</sup> was used for all other atoms. NMR calculations were performed in NWChem<sup>17</sup> using the gauge independent atomic orbital method.<sup>18</sup> The same level of theory and basis sets were used as for the structure optimizations except an all electron basis, ATZP<sup>19</sup> was used for Rh. NMR results for both the ATZP and Stuttgart (with ECP) basis sets are reported below.

**Table S1.** Comparison of calculated and experimental NMR chemical shifts, with ATZP basis set on Rh.

| Complex     | Nuclei      | shielding | shift (ppm) | expt (ppm) | difference |
|-------------|-------------|-----------|-------------|------------|------------|
| <b>1-A</b>  | Si          | 326.56    | 13.92       | -21        | -34.92     |
|             | H (Si)      | 26.89     | 5.11        | 4.23       | -0.88      |
|             | H (Si)      | 26.47     | 5.52        | 4.68       | -0.84      |
|             | H (Rh)      | 39.04     | -7.04       | -13.36     | -6.32      |
|             | N (tr Si)   | 5.55      | -150.78     | -161       | -10.22     |
|             | N (tr H)    | 14.96     | -160.18     | -172       | -11.82     |
|             | C (CO)      | -33.50    | 217.64      | 194.53     | -23.11     |
| C (carbene) | -16.60      | 200.74    | 178.39      | -22.35     |            |
| <b>2-A</b>  | Si          | -30.01    | 370.48      | 6.5        | -363.98    |
|             | H (Si)      | 23.93     | 8.07        | 5.15       | -2.92      |
|             | H (Rh)      | 38.21     | -6.21       | -12.92     | -6.71      |
|             | N (tr Si)   | 21.98     | -167.21     |            |            |
|             | N (tr H)    | 21.13     | -166.35     |            |            |
|             | C (CO)      | -27.07    | 211.21      | 186.33     | -24.88     |
|             | C (carbene) | -10.10    | 194.25      | 169.23     | -25.02     |
| <b>2-B</b>  | Si          | 267.52    | 72.96       | 6.5        | -66.46     |
|             | H (Si)      | 25.98     | 6.02        | 5.15       | -0.87      |
|             | H (Rh)      | 38.43     | -6.43       | -12.92     | -6.49      |
|             | N (bond Si) | 46.21     | -191.43     | -199       | -7.57      |
|             | N (bond Rh) | 7.39      | -152.61     | -167       | -14.39     |
|             | C (CO)      | -22.87    | 207.01      | 186.33     | -20.68     |
|             | C (carbene) | -6.39     | 190.53      | 169.23     | -21.30     |

**Table S2.** Comparison of calculated and experimental NMR chemical shifts, with Stuttgart basis set and ECP on Rh.

| <b>Complex</b> | <b>Nuclei</b> | <b>shielding</b> | <b>shift (ppm)</b> | <b>expt (ppm)</b> | <b>difference</b> |
|----------------|---------------|------------------|--------------------|-------------------|-------------------|
| <b>1-A</b>     | Si            | 331.82           | 8.65               | -21               | -29.65            |
|                | H (Si)        | 26.77            | 5.22               | 4.23              | -0.99             |
|                | H (Si)        | 26.69            | 5.31               | 4.68              | -0.63             |
|                | H (Rh)        | 40.47            | -8.47              | -13.36            | -4.89             |
|                | N (tr Si)     | 5.35             | -150.57            | -161              | -10.43            |
|                | N (tr H)      | 13.43            | -158.65            | -172              | -13.35            |
|                | C (CO)        | -29.75           | 213.89             | 194.53            | -19.36            |
|                | C (carbene)   | -20.67           | 204.81             | 178.39            | -26.42            |
| <b>2-A</b>     | Si            | -18.85           | 359.32             | 6.5               | -352.82           |
|                | H (Si)        | 23.93            | 8.07               | 5.15              | -2.92             |
|                | H (Rh)        | 38.42            | -6.42              | -12.92            | -6.50             |
|                | N (tr Si)     | 20.05            | -165.28            |                   |                   |
|                | N (tr H)      | 20.88            | -166.10            |                   |                   |
|                | C (CO)        | -30.28           | 214.43             | 186.33            | -28.10            |
|                | C (carbene)   | -9.18            | 193.32             | 169.23            | -24.09            |
|                | <b>2-B</b>    | Si               | 261.20             | 79.28             | 6.5               |
| H (Si)         |               | 26.62            | 5.38               | 5.15              | -0.23             |
| H (Rh)         |               | 41.65            | -9.65              | -12.92            | -3.27             |
| N (bond Si)    |               | 48.30            | -193.52            | -199              | -5.48             |
| N (bond Rh)    |               | 6.70             | -151.92            | -167              | -15.08            |
| C (CO)         |               | -26.68           | 210.82             | 186.33            | -24.49            |
| C (carbene)    |               | -7.05            | 191.19             | 169.23            | -21.96            |

**Table S3.** Reference compounds and shieldings used in calculated NMR shifts.

| <b>Compound</b>   | <b>Nuclei</b> | <b>shielding (ppm)</b> |
|-------------------|---------------|------------------------|
| tetramethylsilane | Si            | 340.48                 |
|                   | C             | 184.14                 |
|                   | H             | 32.00                  |
| nitromethane      | N             | -145.23                |

**Table S4.** Coordinates (Å) for optimized geometry of {PhB(Ox<sup>Me2</sup>)<sub>2</sub>Im<sup>Mes</sup>}RhH(SiH<sub>2</sub>Ph)CO (**1-A**).

87 atoms

|    |           |           |           |
|----|-----------|-----------|-----------|
| Rh | 8.035129  | 21.048910 | 4.018572  |
| H  | 6.519867  | 21.327832 | 4.197061  |
| Si | 7.296003  | 19.381528 | 2.494723  |
| H  | 7.564135  | 19.704933 | 1.065240  |
| H  | 8.097154  | 18.130712 | 2.713460  |
| B  | 10.298787 | 23.452857 | 3.590013  |
| C  | 11.140802 | 19.134141 | 2.065680  |
| H  | 10.144750 | 18.759678 | 1.829318  |
| H  | 11.851573 | 18.308654 | 1.955030  |
| H  | 11.399487 | 19.910388 | 1.340627  |
| C  | 11.194506 | 19.690523 | 3.497677  |
| C  | 10.903271 | 18.598890 | 4.526515  |
| H  | 10.862988 | 19.013951 | 5.536540  |
| H  | 11.692433 | 17.840591 | 4.500749  |
| H  | 9.957058  | 18.100001 | 4.313249  |
| C  | 12.545631 | 20.386570 | 3.768639  |
| H  | 12.881288 | 20.265131 | 4.803558  |
| H  | 13.342235 | 20.083315 | 3.088946  |
| C  | 10.931180 | 21.945104 | 3.565764  |
| C  | 6.817045  | 23.119592 | 7.058541  |
| H  | 6.410673  | 23.883854 | 6.392070  |
| H  | 6.572098  | 23.394405 | 8.089451  |
| H  | 6.323655  | 22.172296 | 6.832126  |
| C  | 8.331879  | 22.996032 | 6.883697  |
| C  | 8.905762  | 21.905426 | 7.802069  |
| H  | 8.451633  | 20.935286 | 7.600878  |
| H  | 8.710509  | 22.156012 | 8.849615  |
| H  | 9.986909  | 21.815596 | 7.667126  |
| C  | 9.058096  | 24.344324 | 7.111786  |
| H  | 8.376099  | 25.199383 | 7.084193  |
| H  | 9.647039  | 24.378504 | 8.028780  |
| C  | 9.602749  | 23.532603 | 5.075841  |
| C  | 8.830681  | 24.471385 | 1.651007  |
| H  | 9.533210  | 25.267554 | 1.482289  |
| C  | 7.631045  | 24.223954 | 1.078277  |
| H  | 7.079027  | 24.749572 | 0.318569  |
| C  | 5.849921  | 22.532376 | 1.296701  |
| C  | 5.720725  | 21.846260 | 0.080139  |
| C  | 6.886371  | 21.645477 | -0.858648 |
| H  | 6.719960  | 20.772234 | -1.492443 |
| H  | 7.825733  | 21.505181 | -0.324771 |
| H  | 7.008353  | 22.512776 | -1.517551 |

|   |           |           |           |
|---|-----------|-----------|-----------|
| C | 4.452138  | 21.385713 | -0.281244 |
| H | 4.344094  | 20.835813 | -1.211310 |
| C | 3.329376  | 21.610292 | 0.513226  |
| C | 1.981452  | 21.051752 | 0.128809  |
| H | 1.168663  | 21.698691 | 0.468695  |
| H | 1.833922  | 20.067203 | 0.585595  |
| H | 1.891992  | 20.931114 | -0.953515 |
| C | 3.489323  | 22.348577 | 1.687484  |
| H | 2.620598  | 22.562838 | 2.302595  |
| C | 4.733220  | 22.829192 | 2.095358  |
| C | 4.851371  | 23.679899 | 3.335790  |
| H | 5.461572  | 23.191466 | 4.098324  |
| H | 3.864349  | 23.877372 | 3.758079  |
| H | 5.325060  | 24.640989 | 3.113014  |
| C | 8.030842  | 22.595706 | 2.596707  |
| C | 11.351280 | 24.614047 | 3.182917  |
| C | 11.359799 | 25.893597 | 3.764377  |
| H | 10.689975 | 26.109948 | 4.585996  |
| C | 12.219827 | 26.900361 | 3.322825  |
| H | 12.198600 | 27.873723 | 3.803216  |
| C | 13.101819 | 26.661365 | 2.273013  |
| H | 13.772631 | 27.441819 | 1.928829  |
| C | 13.113194 | 25.404400 | 1.671096  |
| H | 13.795417 | 25.199897 | 0.851807  |
| C | 12.252989 | 24.405789 | 2.121825  |
| H | 12.292924 | 23.436416 | 1.637699  |
| C | 7.829487  | 19.688430 | 5.324748  |
| C | 5.494339  | 18.764373 | 2.577456  |
| C | 5.067110  | 17.842281 | 1.605412  |
| H | 5.746836  | 17.543270 | 0.812023  |
| C | 3.787501  | 17.293220 | 1.634127  |
| H | 3.486447  | 16.581292 | 0.872159  |
| C | 2.896059  | 17.654324 | 2.644708  |
| H | 1.900575  | 17.223565 | 2.674751  |
| C | 3.295532  | 18.568392 | 3.616109  |
| H | 2.609371  | 18.855841 | 4.406400  |
| C | 4.578775  | 19.115925 | 3.578054  |
| H | 4.866421  | 19.832069 | 4.340086  |
| N | 10.252597 | 20.851047 | 3.612064  |
| N | 8.693887  | 22.709316 | 5.464583  |
| N | 9.067124  | 23.469682 | 2.578212  |
| N | 7.138593  | 23.063109 | 1.666953  |
| O | 12.276633 | 21.791755 | 3.552637  |
| O | 9.965534  | 24.465846 | 5.989079  |
| O | 7.611882  | 18.881107 | 6.106389  |

Energy: -6803.357051 hartree (ATZP basis on Rh)

**Table S5.** Coordinates (Å) for Optimized geometry of [ $\{\text{PhB}(\text{Ox}^{\text{Me}_2})_2\text{Im}^{\text{Mes}}\}\text{RhH}(\text{SiHPh})\text{CO}]^+$  (2-A).

86 atoms

|    |           |           |           |
|----|-----------|-----------|-----------|
| Rh | 7.995679  | 21.192349 | 4.053982  |
| H  | 6.545793  | 21.591063 | 4.464559  |
| Si | 6.832424  | 20.011493 | 2.488178  |
| H  | 7.408982  | 19.519996 | 1.209316  |
| C  | 10.338046 | 23.502179 | 3.622782  |
| C  | 10.731747 | 19.205606 | 1.762994  |
| H  | 9.696284  | 18.882475 | 1.639112  |
| H  | 11.379059 | 18.354620 | 1.532132  |
| H  | 10.933980 | 19.996536 | 1.036175  |
| C  | 10.988807 | 19.697176 | 3.194948  |
| C  | 10.761695 | 18.575255 | 4.207515  |
| H  | 10.853187 | 18.942320 | 5.232343  |
| H  | 11.506027 | 17.786644 | 4.064206  |
| H  | 9.778586  | 18.116337 | 4.083138  |
| C  | 12.403928 | 20.304206 | 3.333911  |
| H  | 12.865914 | 20.085758 | 4.300157  |
| H  | 13.085954 | 20.023941 | 2.531903  |
| C  | 10.880150 | 21.964189 | 3.427363  |
| C  | 7.044570  | 23.730702 | 6.887942  |
| H  | 7.115534  | 24.636693 | 6.280679  |
| H  | 6.742041  | 24.017565 | 7.899190  |
| H  | 6.262824  | 23.093820 | 6.468225  |
| C  | 8.386556  | 22.985881 | 6.924570  |
| C  | 8.306790  | 21.760336 | 7.834556  |
| H  | 7.445813  | 21.135757 | 7.591539  |
| H  | 8.189882  | 22.078463 | 8.874613  |
| H  | 9.214995  | 21.156727 | 7.767417  |
| C  | 9.545008  | 23.919342 | 7.345854  |
| H  | 9.219815  | 24.831294 | 7.845292  |
| H  | 10.294034 | 23.411891 | 7.958899  |
| C  | 9.736333  | 23.462815 | 5.146590  |
| C  | 8.800567  | 24.599773 | 1.732742  |
| H  | 9.493988  | 25.403914 | 1.559122  |
| C  | 7.614340  | 24.316309 | 1.141179  |
| H  | 7.069846  | 24.815206 | 0.358167  |
| C  | 5.954641  | 22.453306 | 1.332745  |
| C  | 5.998017  | 21.714517 | 0.125503  |
| C  | 7.251243  | 21.608210 | -0.708818 |
| H  | 7.243801  | 20.690181 | -1.298742 |
| H  | 8.161861  | 21.629789 | -0.109878 |
| H  | 7.306311  | 22.447038 | -1.410515 |
| C  | 4.805732  | 21.145568 | -0.337053 |

|   |           |           |           |
|---|-----------|-----------|-----------|
| H | 4.828948  | 20.570481 | -1.256904 |
| C | 3.594666  | 21.324815 | 0.326822  |
| C | 2.322819  | 20.701647 | -0.185647 |
| H | 2.018088  | 19.870065 | 0.458157  |
| H | 2.443965  | 20.315039 | -1.198614 |
| H | 1.503906  | 21.425546 | -0.190327 |
| C | 3.578664  | 22.113339 | 1.487465  |
| H | 2.633668  | 22.291591 | 1.990225  |
| C | 4.726976  | 22.704699 | 1.997179  |
| C | 4.657327  | 23.629935 | 3.183004  |
| H | 5.302901  | 23.293910 | 3.997450  |
| H | 3.635331  | 23.699571 | 3.556702  |
| H | 4.988794  | 24.636728 | 2.911221  |
| C | 8.021429  | 22.756301 | 2.711286  |
| C | 11.377309 | 24.674934 | 3.256475  |
| C | 11.331745 | 25.936922 | 3.876285  |
| H | 10.644331 | 26.110075 | 4.694519  |
| C | 12.162687 | 26.983582 | 3.478113  |
| H | 12.103753 | 27.940348 | 3.986291  |
| C | 13.068122 | 26.802796 | 2.435981  |
| H | 13.718803 | 27.613675 | 2.127309  |
| C | 13.130751 | 25.566822 | 1.796744  |
| H | 13.832605 | 25.410445 | 0.984266  |
| C | 12.297447 | 24.526038 | 2.201986  |
| H | 12.379470 | 23.574944 | 1.689320  |
| C | 7.869457  | 19.719342 | 5.315292  |
| C | 5.269848  | 19.061494 | 2.747612  |
| C | 4.902585  | 18.075492 | 1.808591  |
| H | 5.502329  | 17.926638 | 0.916805  |
| C | 3.780532  | 17.279244 | 2.015292  |
| H | 3.515337  | 16.516675 | 1.291996  |
| C | 3.000220  | 17.462475 | 3.156921  |
| H | 2.126785  | 16.840782 | 3.319246  |
| C | 3.341208  | 18.439621 | 4.094211  |
| H | 2.732521  | 18.576320 | 4.980648  |
| C | 4.466404  | 19.230040 | 3.892974  |
| H | 4.726329  | 19.982841 | 4.629354  |
| N | 10.139227 | 20.904235 | 3.470196  |
| N | 8.805585  | 22.648227 | 5.523375  |
| N | 9.041242  | 23.626677 | 2.689583  |
| N | 7.135749  | 23.158152 | 1.753120  |
| O | 12.192626 | 21.737684 | 3.264636  |
| O | 10.184443 | 24.294372 | 6.097147  |
| O | 7.718932  | 18.847860 | 6.028721  |

Energy: -6802.554917 hartree (ATZP basis on Rh)

**Table S6.** Coordinates (Å) for optimized geometry of [ $\{\kappa^3\text{-N,Si,C-PhB}(\text{Ox}^{\text{Me}_2})(\text{Ox}^{\text{Me}_2}\text{SiHPh})\text{Im}^{\text{Mes}}\}\text{Rh}(\text{H})\text{CO}]^+$  (**2-B**).

86 atoms

|    |           |           |           |
|----|-----------|-----------|-----------|
| Rh | 6.865600  | 21.644470 | 3.970221  |
| H  | 5.874576  | 21.115943 | 2.878378  |
| Si | 8.097435  | 20.114547 | 2.786408  |
| H  | 8.054880  | 20.271180 | 1.314714  |
| C  | 9.960720  | 23.124209 | 3.474714  |
| C  | 11.137707 | 19.022945 | 1.434233  |
| H  | 10.224508 | 18.574895 | 1.038050  |
| H  | 11.953309 | 18.313940 | 1.268295  |
| H  | 11.351556 | 19.932464 | 0.867457  |
| C  | 11.006194 | 19.313197 | 2.934987  |
| C  | 10.804519 | 18.026468 | 3.736224  |
| H  | 10.545901 | 18.238730 | 4.775386  |
| H  | 11.749677 | 17.474636 | 3.732914  |
| H  | 10.043817 | 17.380062 | 3.307071  |
| C  | 12.224646 | 20.068417 | 3.485350  |
| H  | 12.464994 | 19.797608 | 4.515441  |
| H  | 13.114520 | 19.980752 | 2.863640  |
| C  | 10.520077 | 21.558817 | 3.329994  |
| C  | 6.794584  | 23.362193 | 7.302627  |
| H  | 6.662607  | 24.336143 | 6.825644  |
| H  | 6.769468  | 23.505989 | 8.386509  |
| H  | 5.945336  | 22.727780 | 7.036291  |
| C  | 8.117134  | 22.720026 | 6.879260  |
| C  | 8.290459  | 21.328231 | 7.503803  |
| H  | 7.479630  | 20.656190 | 7.221609  |
| H  | 8.289082  | 21.407291 | 8.594531  |
| H  | 9.238394  | 20.877745 | 7.197408  |
| C  | 9.332296  | 23.619810 | 7.202447  |
| H  | 9.051450  | 24.654284 | 7.415183  |
| H  | 9.964807  | 23.241797 | 8.004345  |
| C  | 9.347941  | 23.130197 | 4.998487  |
| C  | 8.868665  | 24.285718 | 1.374000  |
| H  | 9.771648  | 24.816779 | 1.133415  |
| C  | 7.647043  | 24.326210 | 0.788148  |
| H  | 7.278695  | 24.900030 | -0.044621 |
| C  | 5.420094  | 23.285431 | 1.221613  |
| C  | 5.040764  | 22.522353 | 0.107438  |
| C  | 6.052193  | 21.877377 | -0.809927 |
| H  | 5.575651  | 21.110329 | -1.422229 |
| H  | 6.870785  | 21.413778 | -0.256377 |
| H  | 6.497275  | 22.609224 | -1.492130 |
| C  | 3.675602  | 22.381802 | -0.151322 |

|   |           |           |           |
|---|-----------|-----------|-----------|
| H | 3.367218  | 21.785926 | -1.004555 |
| C | 2.702545  | 22.983379 | 0.647921  |
| C | 1.235717  | 22.842801 | 0.323906  |
| H | 0.625227  | 22.838229 | 1.229618  |
| H | 1.034981  | 21.922411 | -0.228102 |
| H | 0.894916  | 23.679063 | -0.296103 |
| C | 3.124928  | 23.749237 | 1.737061  |
| H | 2.383292  | 24.234616 | 2.363738  |
| C | 4.475283  | 23.920381 | 2.042962  |
| C | 4.880343  | 24.771036 | 3.223526  |
| H | 5.192284  | 24.158119 | 4.077186  |
| C | 4.042150  | 25.385245 | 3.555490  |
| H | 5.713725  | 25.435441 | 2.982682  |
| C | 7.538012  | 22.914437 | 2.528253  |
| C | 11.129044 | 24.216785 | 3.220393  |
| C | 11.098994 | 25.463860 | 3.867704  |
| H | 10.353212 | 25.659700 | 4.628548  |
| C | 12.011206 | 26.474444 | 3.568599  |
| H | 11.958440 | 27.420415 | 4.096802  |
| C | 12.988183 | 26.271745 | 2.597926  |
| H | 13.702331 | 27.053824 | 2.365521  |
| C | 13.035731 | 25.051956 | 1.927384  |
| H | 13.787671 | 24.880003 | 1.164562  |
| C | 12.119447 | 24.048237 | 2.235801  |
| H | 12.187845 | 23.115295 | 1.686930  |
| C | 5.903940  | 20.422083 | 5.144743  |
| C | 7.650629  | 18.322225 | 3.115907  |
| C | 7.294154  | 17.533157 | 2.008842  |
| H | 7.330311  | 17.952318 | 1.008139  |
| C | 6.886099  | 16.209199 | 2.171625  |
| H | 6.615621  | 15.616970 | 1.304737  |
| C | 6.821926  | 15.653041 | 3.446240  |
| H | 6.502288  | 14.625241 | 3.575521  |
| C | 7.162530  | 16.423779 | 4.559182  |
| H | 7.107796  | 15.994409 | 5.553248  |
| C | 7.567010  | 17.743839 | 4.393965  |
| H | 7.830953  | 18.321751 | 5.273808  |
| N | 9.923860  | 20.391452 | 3.132011  |
| N | 8.216778  | 22.631007 | 5.381636  |
| N | 8.791893  | 23.409929 | 2.448392  |
| N | 6.827071  | 23.465135 | 1.502928  |
| O | 11.823883 | 21.458675 | 3.491042  |
| O | 10.116084 | 23.623875 | 5.979451  |
| O | 5.201635  | 19.748790 | 5.732744  |

Energy: -6802.582444 hartree (ATZP basis on Rh)



**Figure S12.**  $^1\text{H}$  NMR spectrum of benzyl(1-ethoxyethoxy)dimethylsilane from the hydrosilylation reaction of ethyl acetate and benzyldimethylsilane catalyzed by **2**.

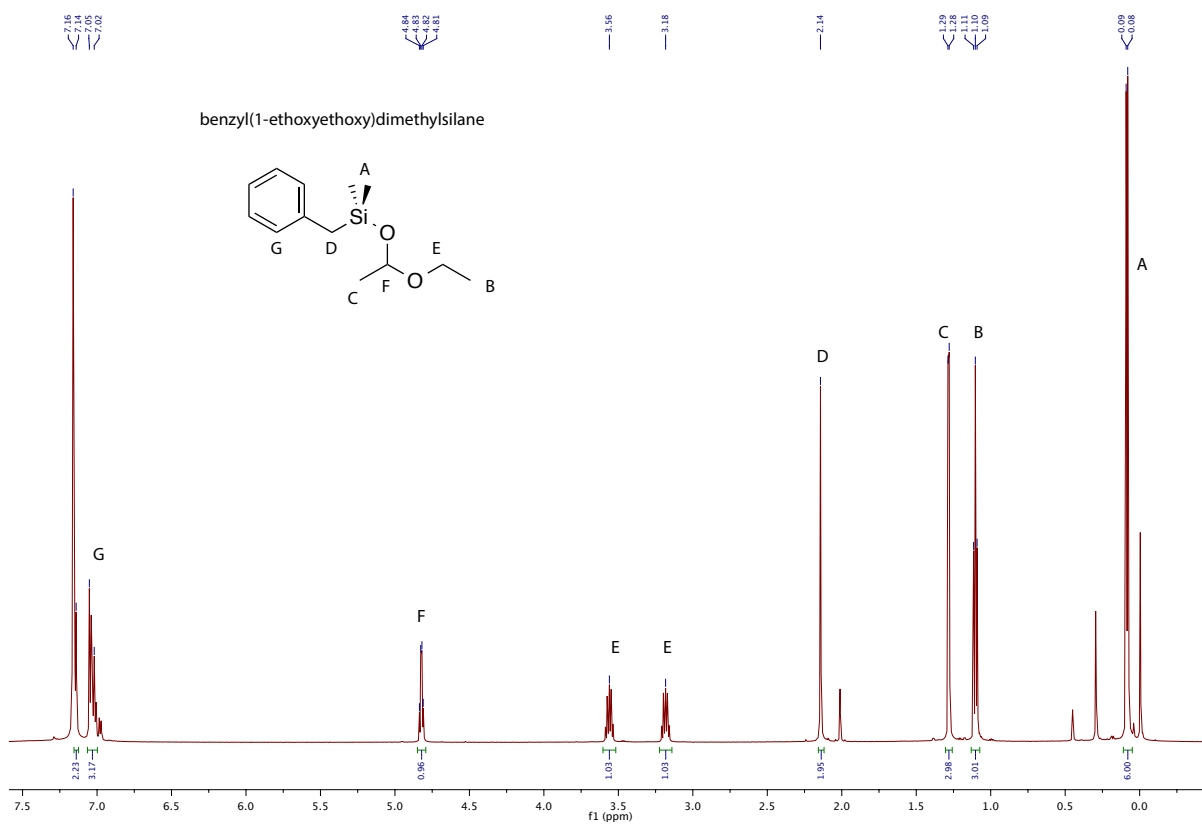

**Figure S13.**  $^{13}\text{C}\{^1\text{H}\}$  NMR spectrum of benzyl(1-ethoxyethoxy)dimethylsilane from the hydrosilylation reaction of ethyl acetate and benzyldimethylsilane catalyzed by **2**.

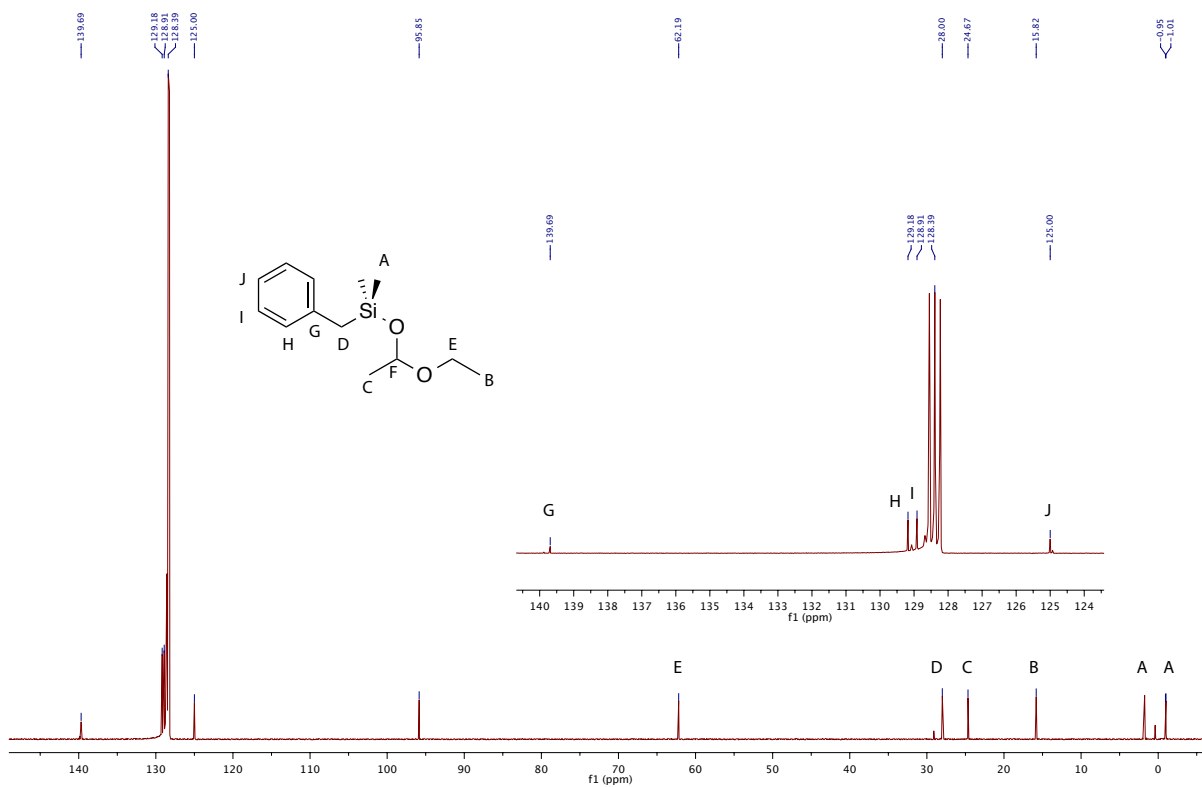

**Figure S14.** Gas chromatogram of benzyl(1-ethoxyethoxy)dimethylsilane from the hydrosilylation reaction of ethyl acetate and benzyldimethylsilane catalyzed by **2**. Retention time: 8.24 min. Fragmentation: 238.1 ( $M^+$ ), 193.1 ( $M^+ - OCH_2CH_3$ ), 147.1 ( $M^+ - OCH(CH_3)OCH_2CH_3$ ).

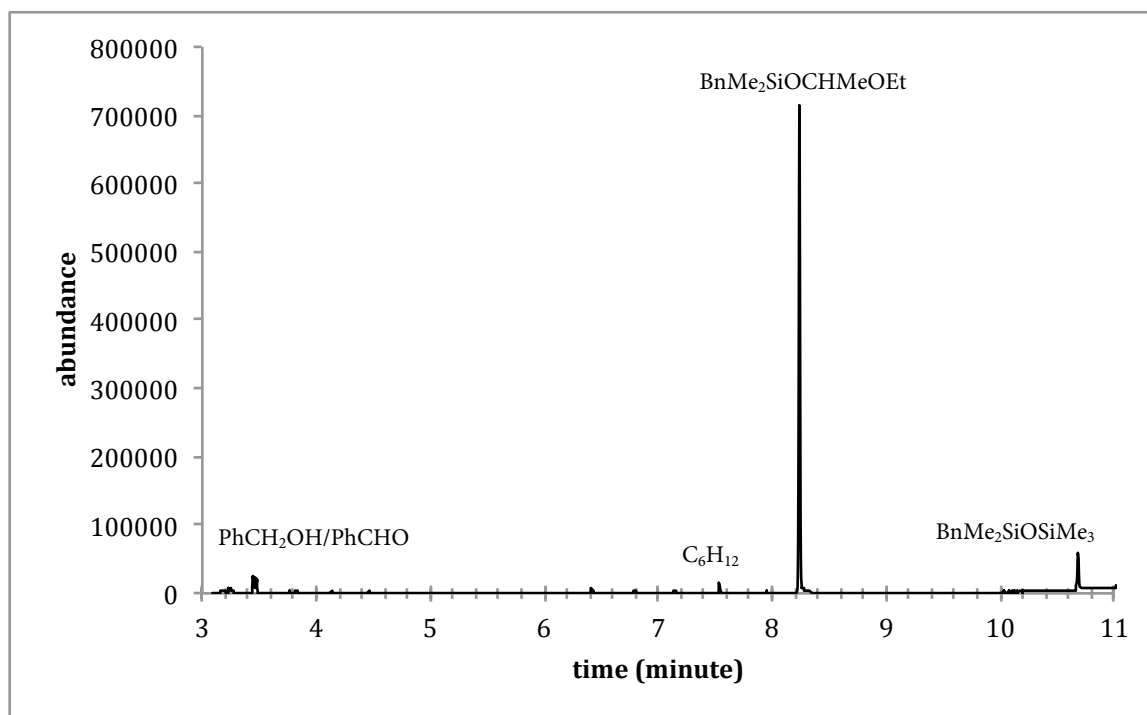

**Figure S15.**  $^1\text{H}$  NMR spectrum of hexadecyl methyl ether from the deoxygenation reaction of methyl palmitate with phenylsilane catalyzed by **2**.

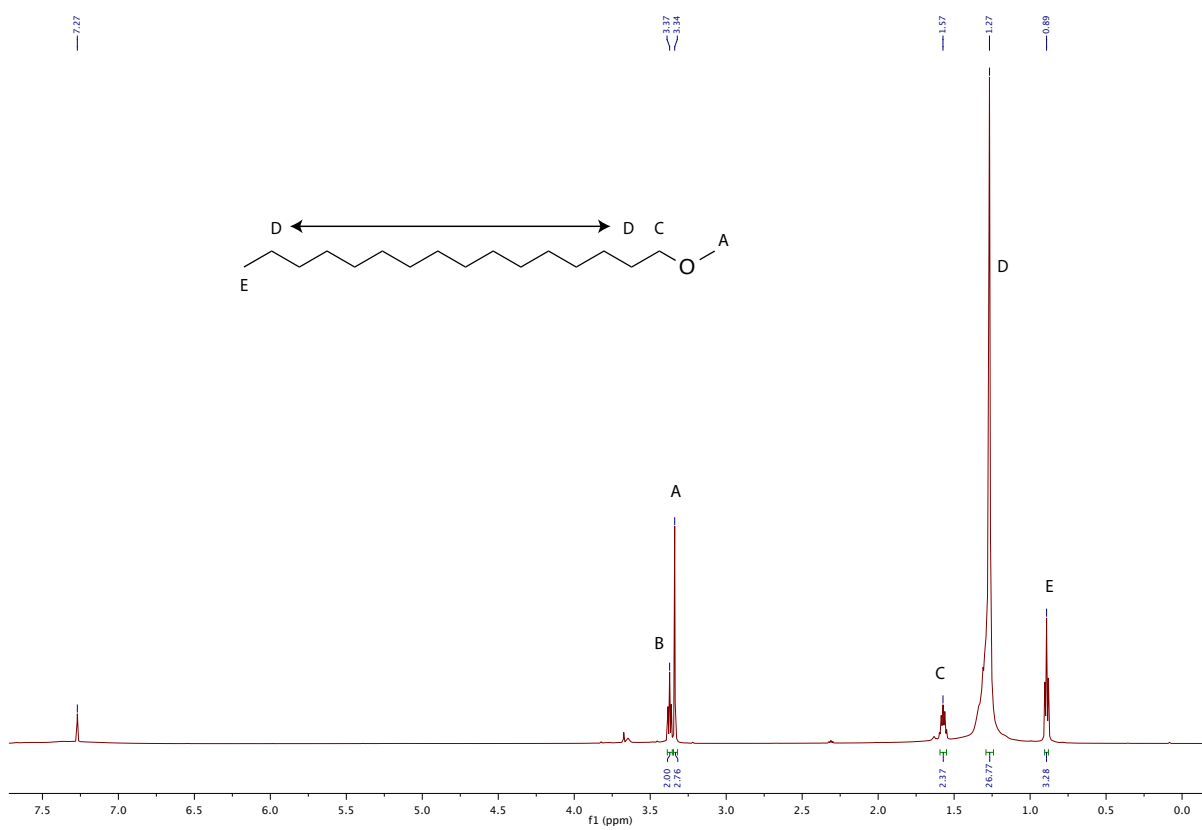

**Figure S16.**  $^{13}\text{C}\{^1\text{H}\}$  NMR spectrum of hexadecyl methyl ether from the deoxygenation reaction of methyl palmitate with phenylsilane catalyzed by **2**.

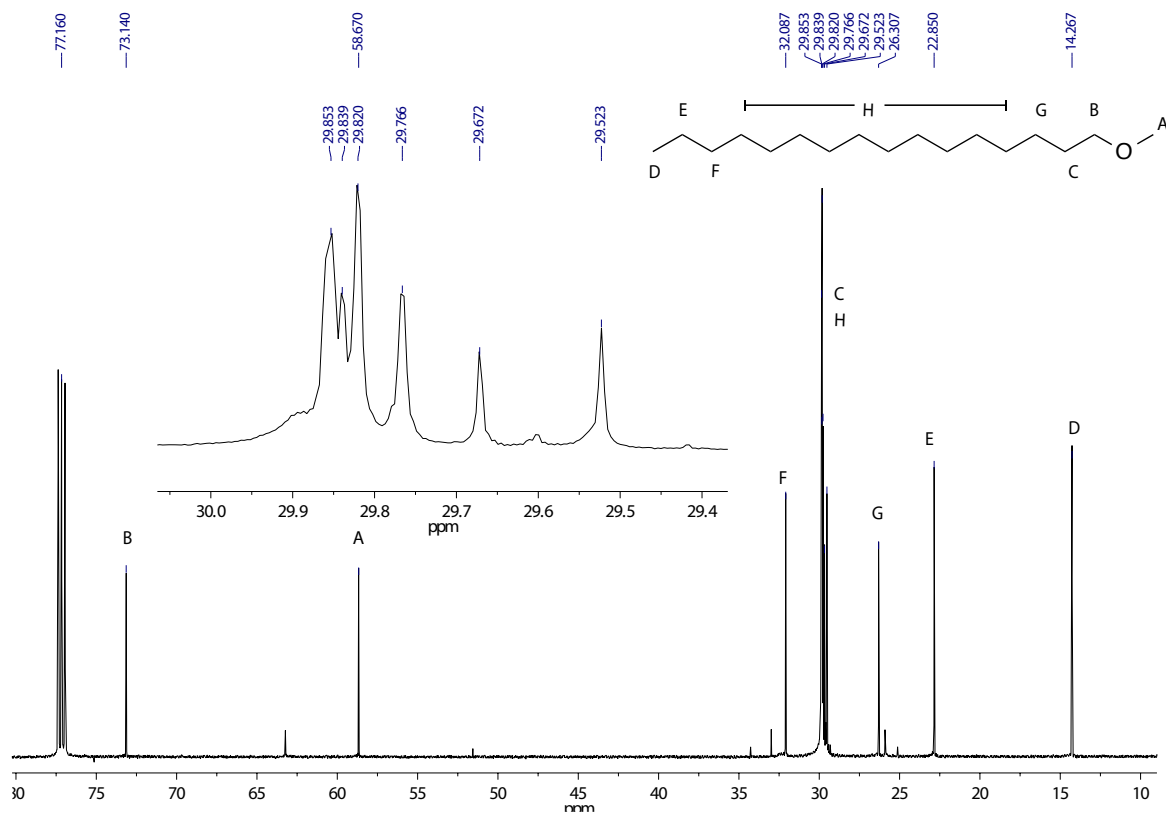

**Figure S17.** Gas chromatogram of hexadecyl methyl ether from the deoxygenation reaction of methyl palmitate with phenylsilane catalyzed by **2**. Retention time: 9.58 min. Fragmentation: 255.2 ( $M^+$ ), 224.2 ( $M^+ - OCH_3$ ).

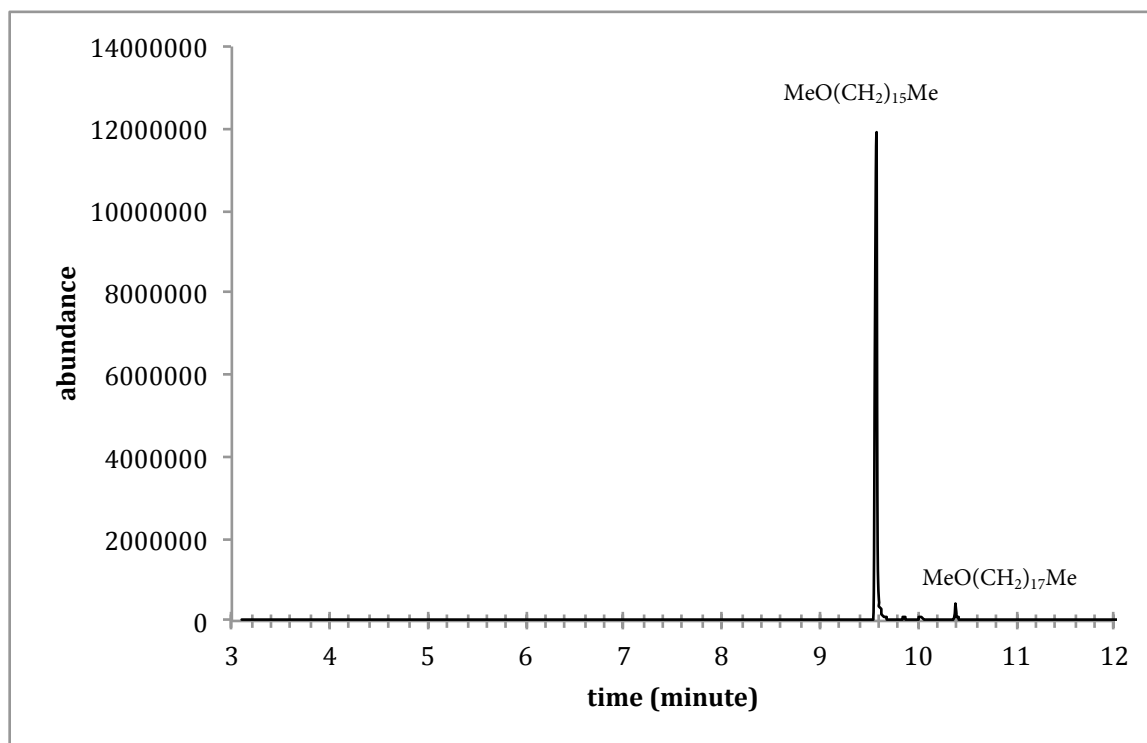

**Figure S18.**  $^1\text{H}$  NMR spectrum of *exo*-2-methoxybicyclo[2.2.1]heptane from the deoxygenation reaction of *exo*-2-norbornylformate with phenylsilane catalyzed by **2**.

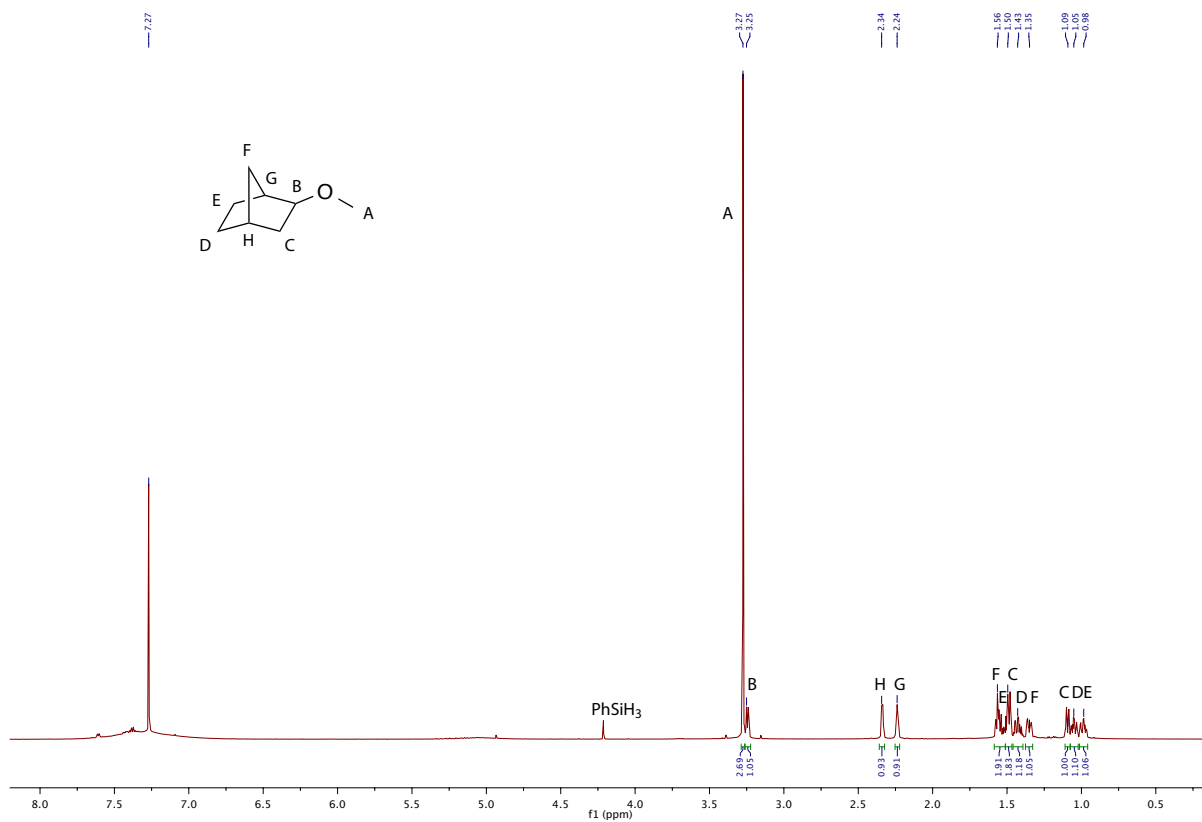

**Figure S19.**  $^{13}\text{C}\{^1\text{H}\}$  NMR spectrum of *exo*-2-methoxybicyclo[2.2.1]heptane from the deoxygenation reaction of *exo*-2-norbornylformate with phenylsilane catalyzed by **2**.

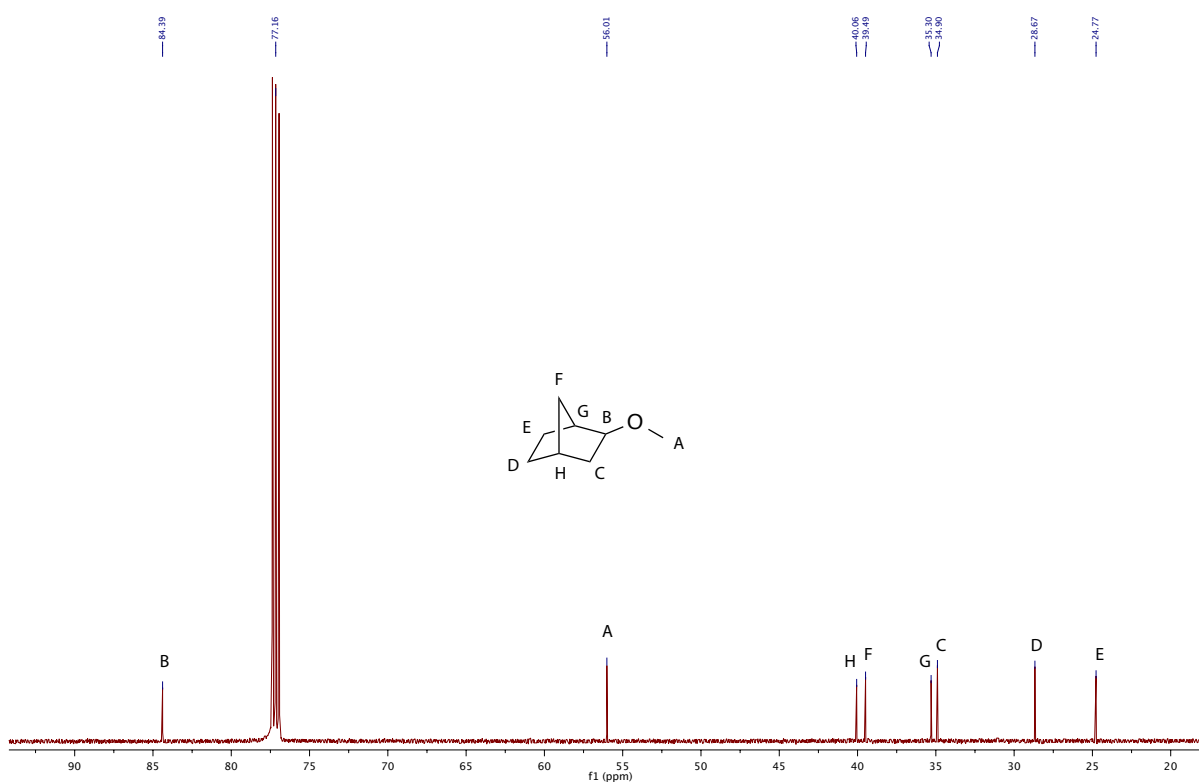



**Figure S20.** GC chromatograph of *exo*-2-methoxybicyclo[2.2.1]heptane from the deoxygenation reaction of *exo*-2-norbornylformate with phenylsilane catalyzed by **2**. Retention time: 3.46 min. Fragmentation: 126.1 ( $M^+$ ), 111.1 ( $M^+ - CH_3$ ), 97.0 ( $M^+ - OCH_3$ ).

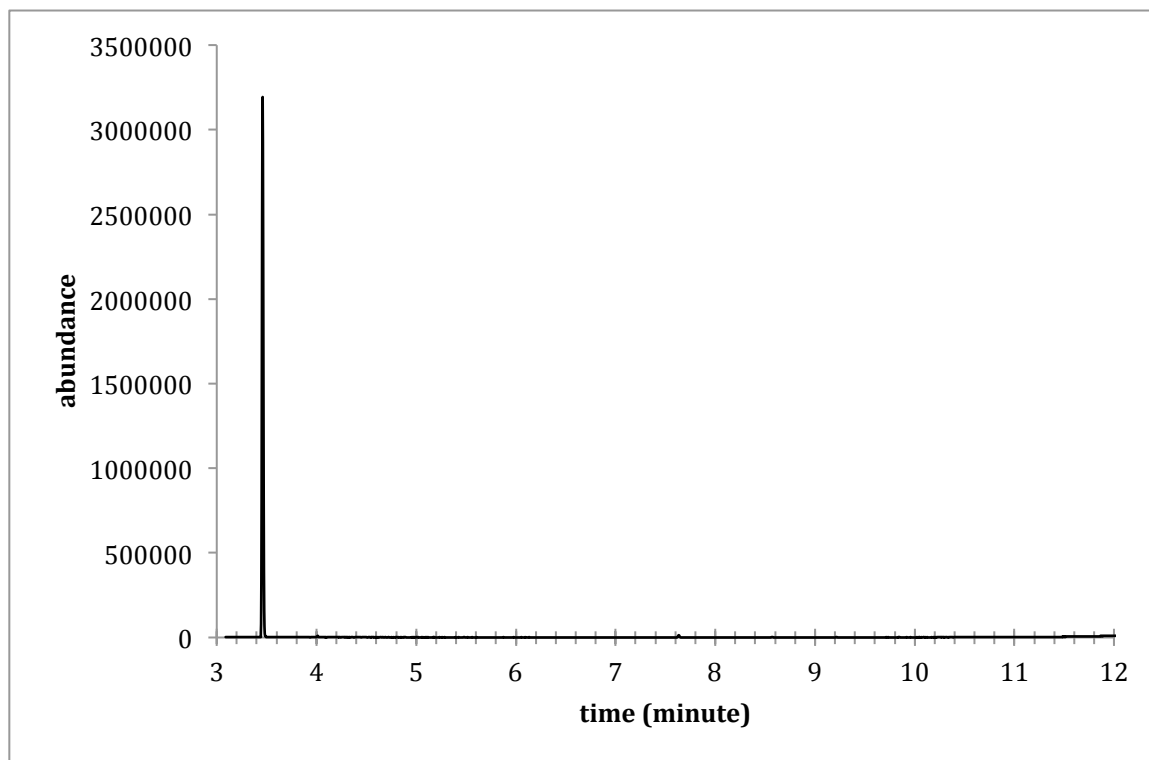

**Figure S21.**  $^1\text{H}$  NMR spectrum of 1-bromo-6-ethoxyhexane from the deoxygenation reaction of ethyl 6-bromohexanoate with phenylsilane catalyzed by **2**. The product was purified by distillation, and GC analysis (Figure S22) confirms the isolated materials is a single product.

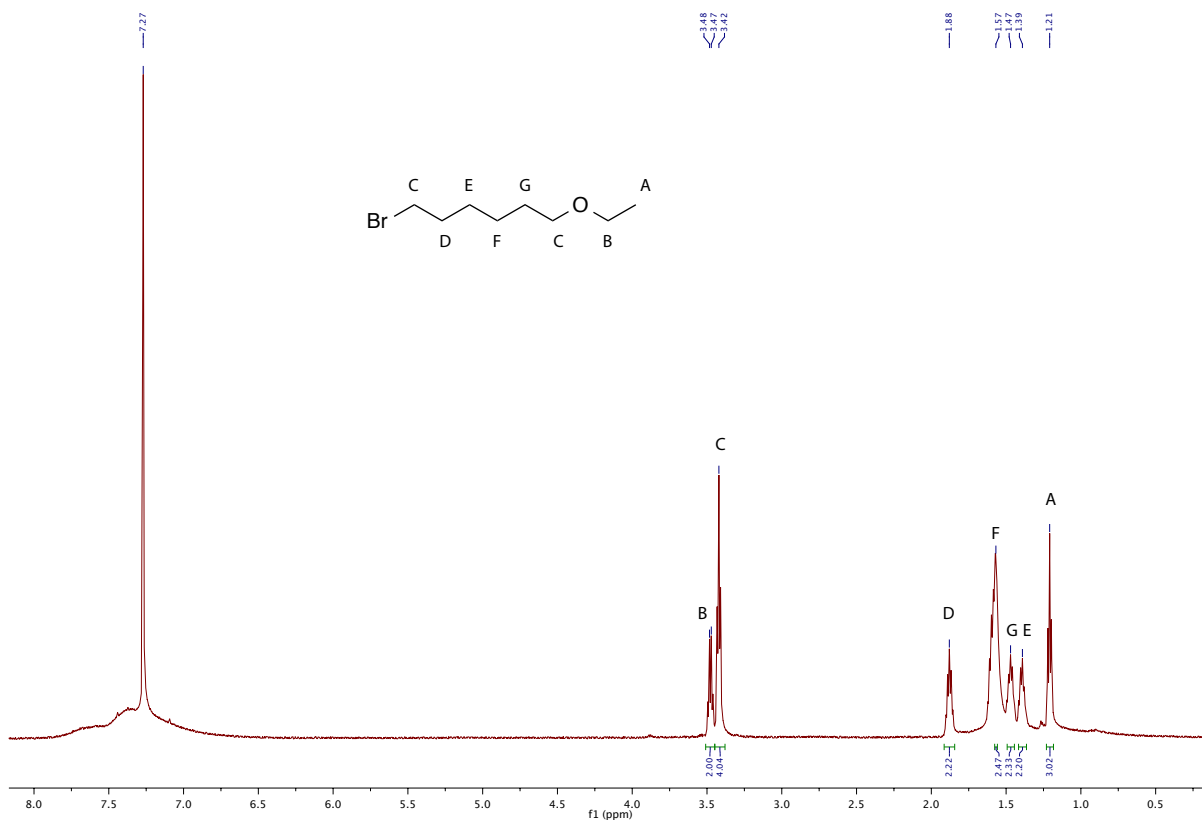

**Figure S22.**  $^{13}\text{C}\{^1\text{H}\}$  NMR spectrum of 1-bromo-6-ethoxyhexane from the deoxygenation reaction of ethyl 6-bromohexanoate with phenylsilane catalyzed by **2**.

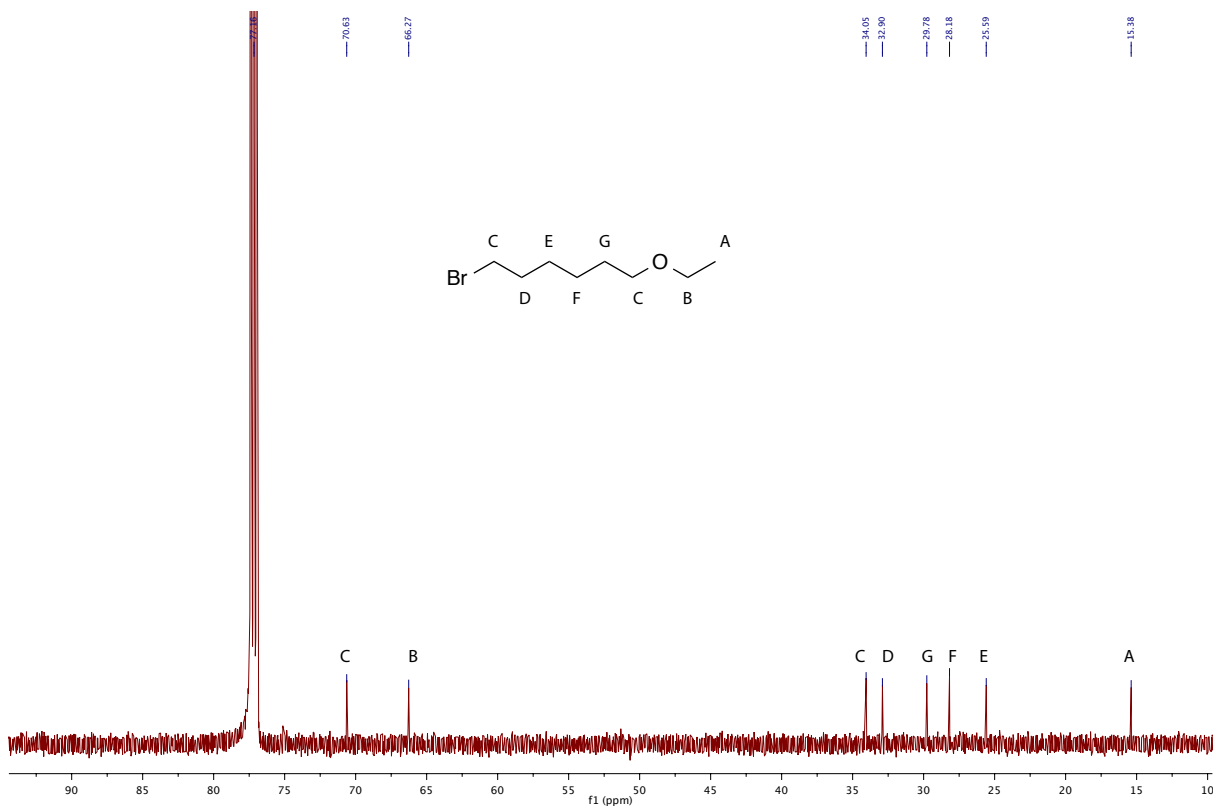

**Figure S23.** Gas chromatogram of 1-bromo-6-ethoxyhexane from the deoxygenation reaction of ethyl 6-bromohexanoate with phenylsilane catalyzed by **2**. Retention time: 6.12 min. Fragmentation: 209.1 ( $M^+$ ), 164.0 ( $M^+ - OCH_2CH_3$ ), 83.1 ( $M^+ - OCH_2CH_3 - Br$ ).

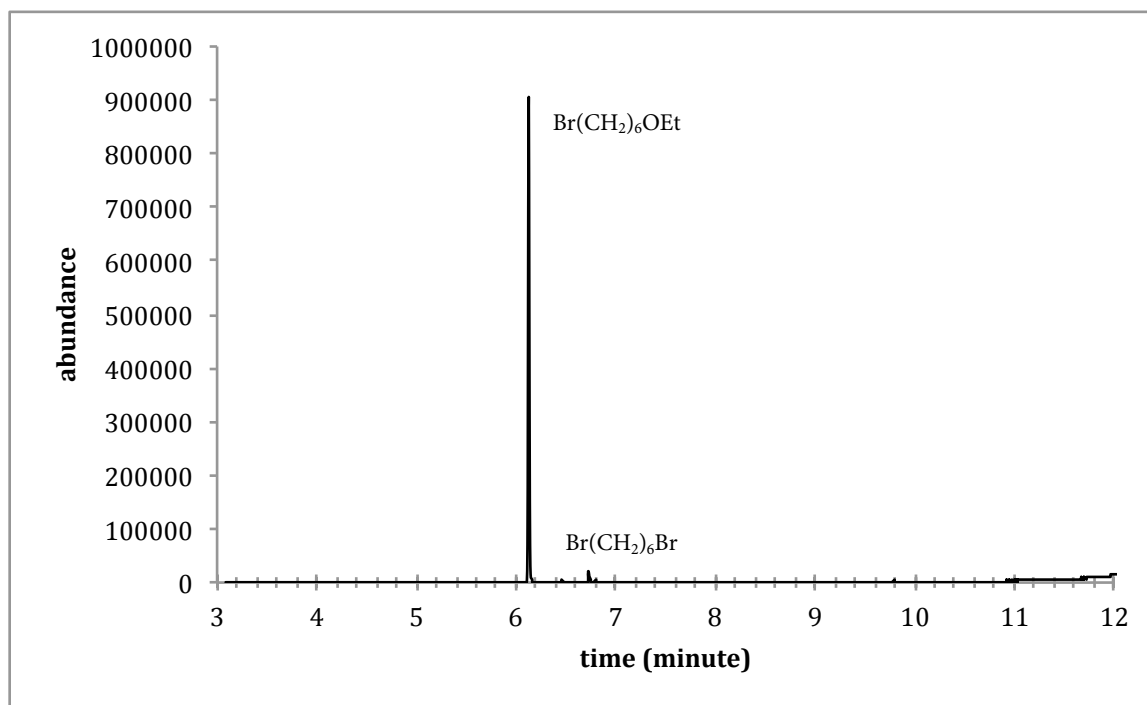

**Figure S24.**  $^1\text{H}$  NMR spectrum of 2-(2-ethoxyethyl)thiophene from the deoxygenation reaction of ethyl 2-thiopheneacetate with phenylsilane catalyzed by **2**.

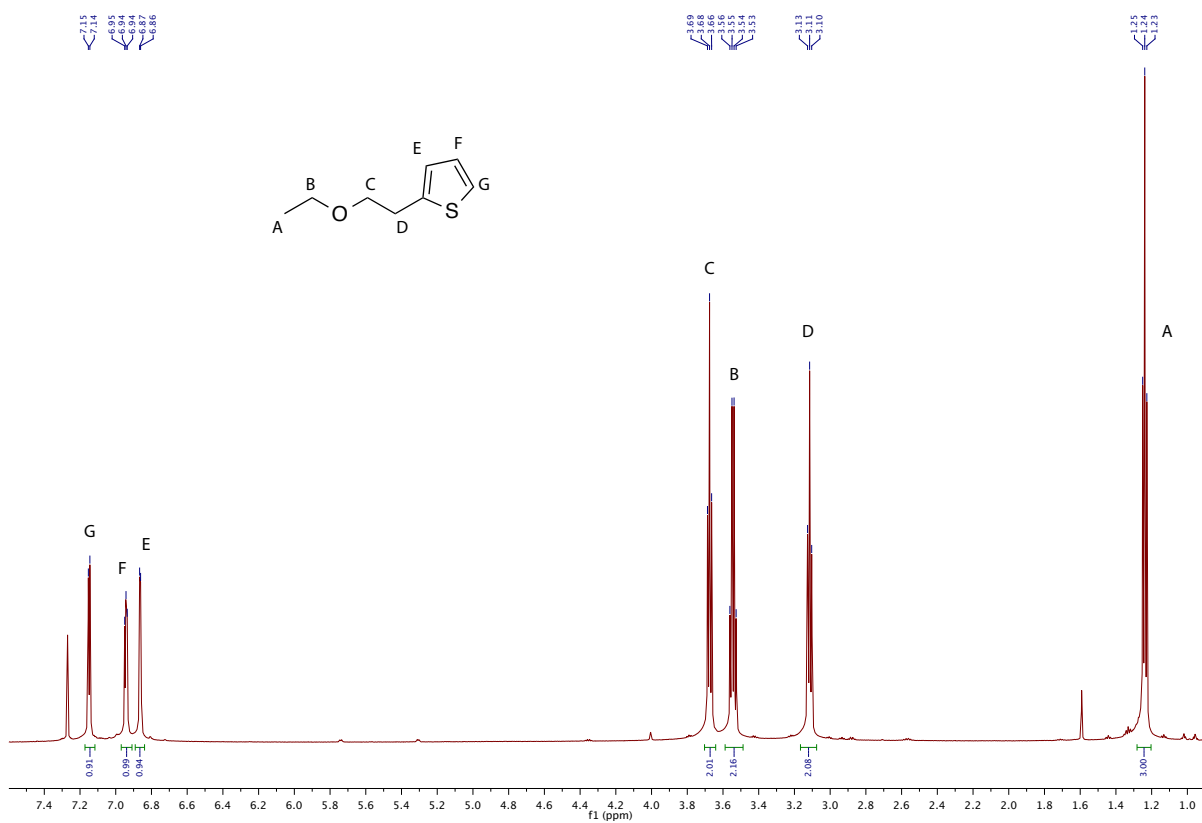

**Figure S25.**  $^{13}\text{C}\{^1\text{H}\}$  NMR spectrum of 2-(2-ethoxyethyl)thiophene from the deoxygenation reaction of ethyl 2-thiopheneacetate with phenylsilane catalyzed by **2**.

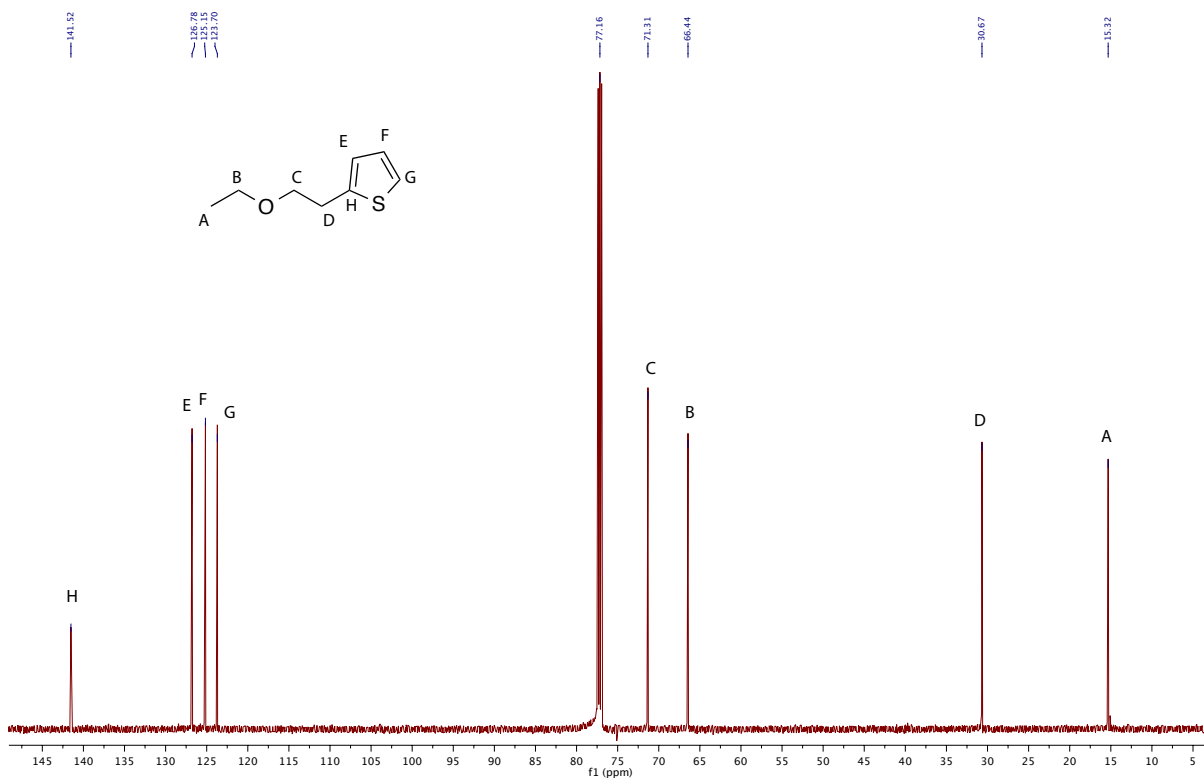

**Figure S26.** Gas chromatogram of 2-(2-ethoxyethyl)thiophene from the deoxygenation reaction of ethyl 2-thiopheneacetate with phenylsilane catalyzed by **2**. Retention time: 5.43 min. Fragmentation: 156.1 ( $M^+$ ), 59.0 ( $M^+ - CH_2C_4H_3S$ ).

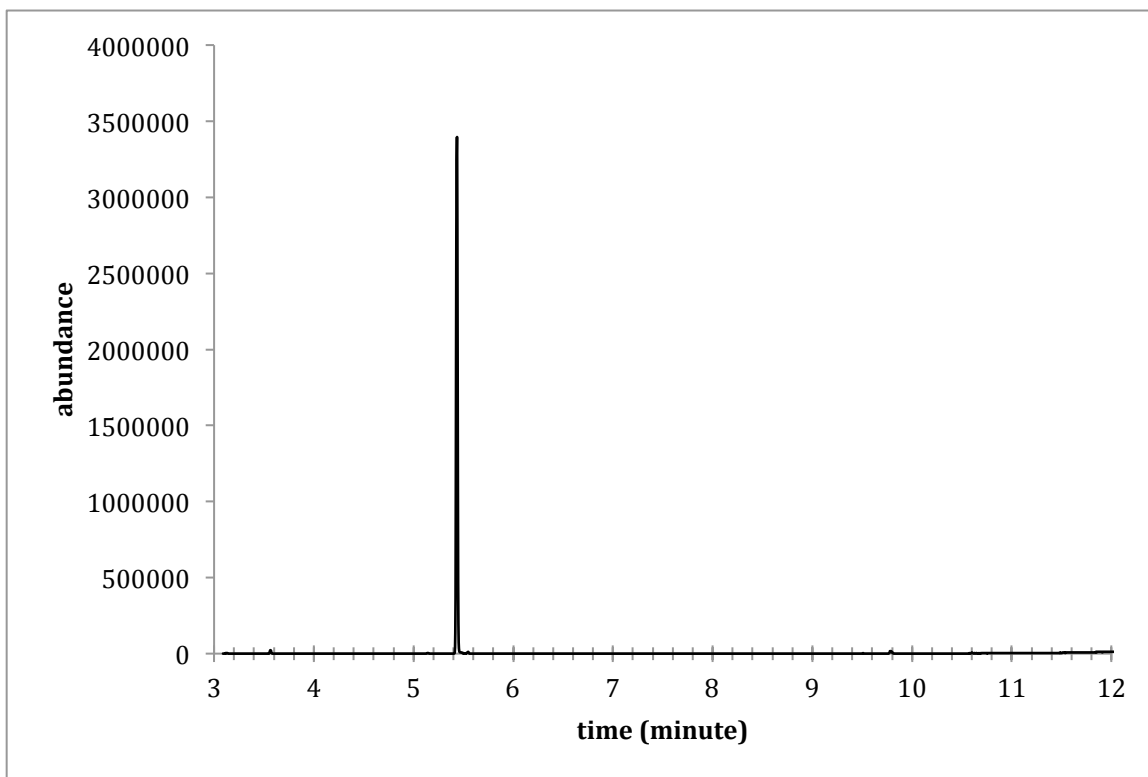

**Figure S27.**  $^1\text{H}$  NMR spectrum of (*Z*)-1-methoxyoctadec-9-ene from the deoxygenation reaction of methyl oleate with phenylsilane catalyzed by **2**.

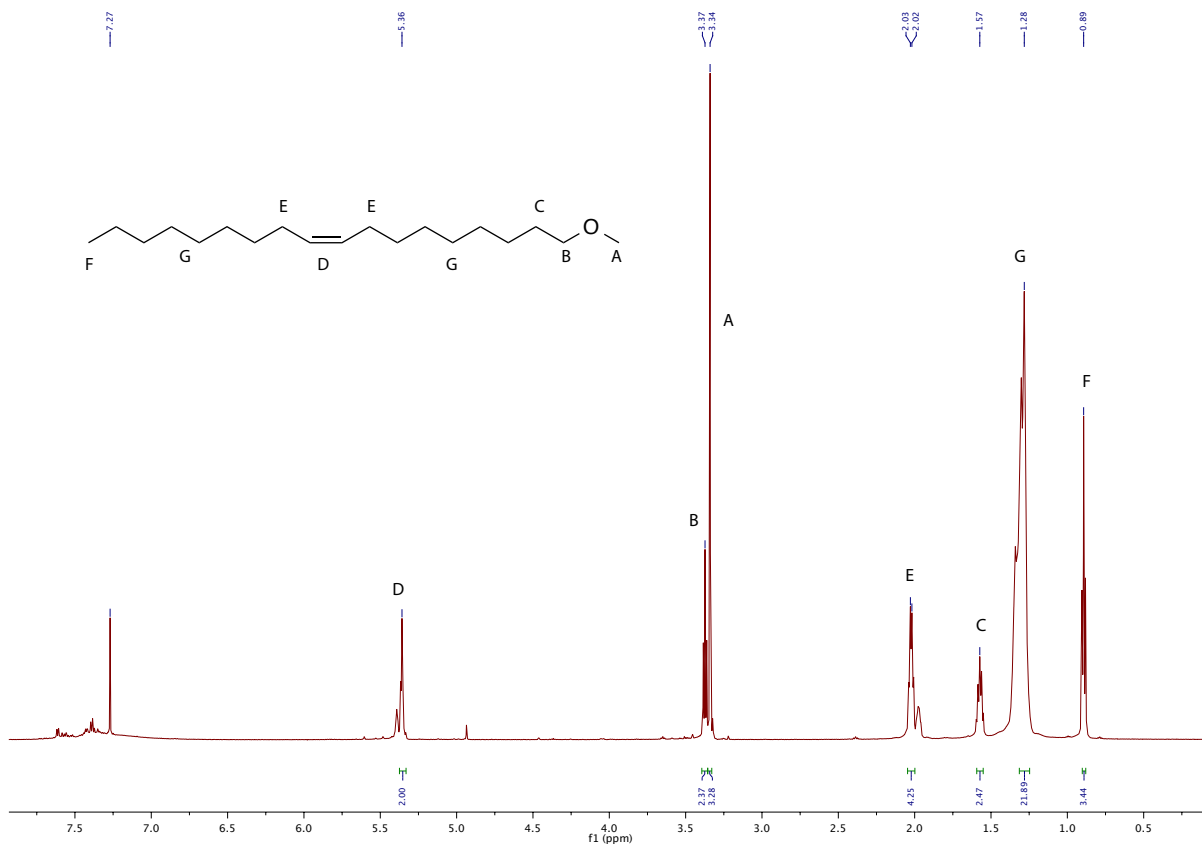



**Figure S28.**  $^{13}\text{C}\{^1\text{H}\}$  NMR spectrum of (*Z*)-1-methoxyoctadec-9-ene from the deoxygenation reaction of methyl oleate with phenylsilane catalyzed by **2**.

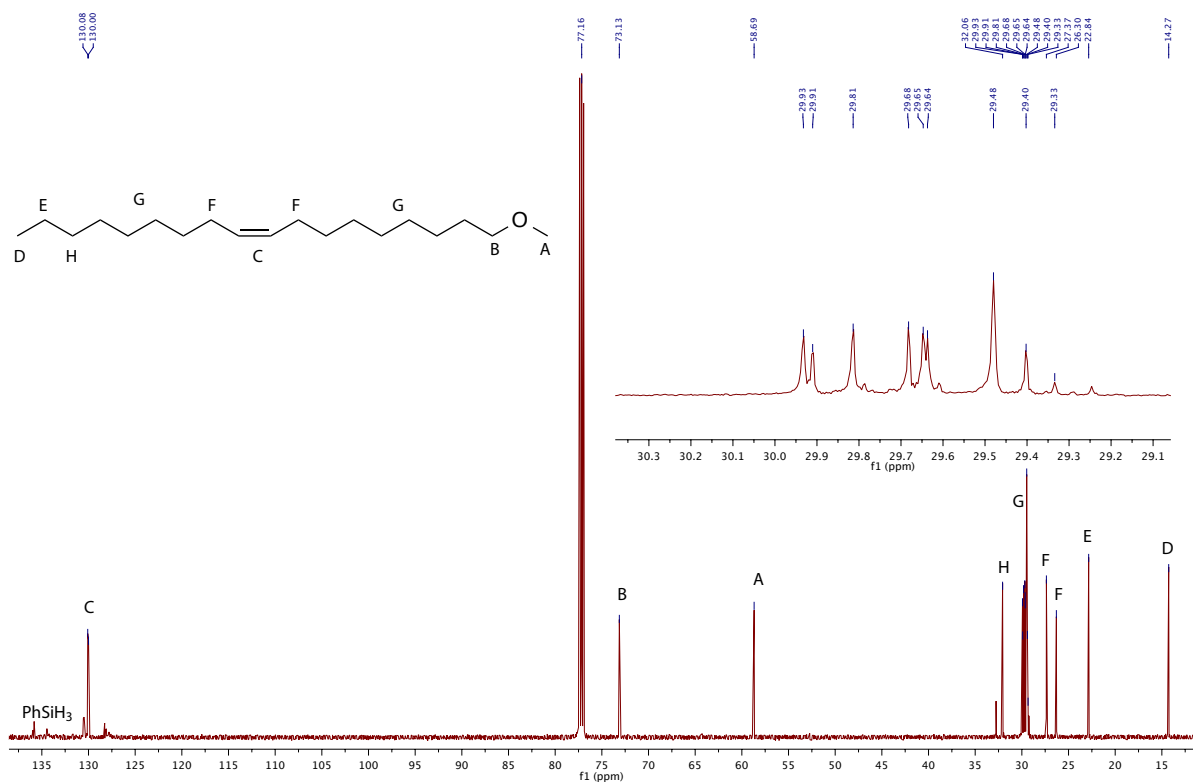

**Figure S29.** GC chromatograph of (*Z*)-1-methoxyoctadec-9-ene from the deoxygenation reaction of methyl oleate with phenylsilane catalyzed by **2**. Retention time: 10.32 min. Fragmentation: 282.3 ( $M^+$ ), 251.3 ( $M^+ - OCH_3$ ).

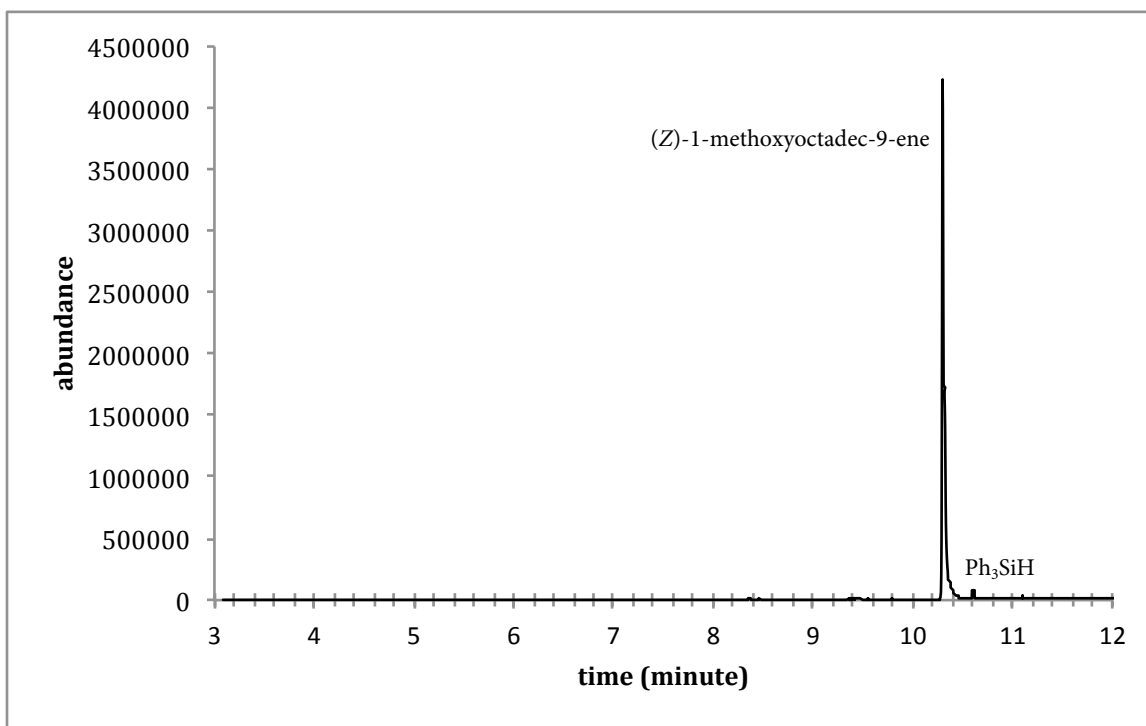

**Figure S30.**  $^1\text{H}$  NMR spectrum of 2-ethyl-1,3-dimethoxybenzene from the deoxygenation reaction of 2',6'-dimethoxyacetophenone with phenylsilane catalyzed by **2**.

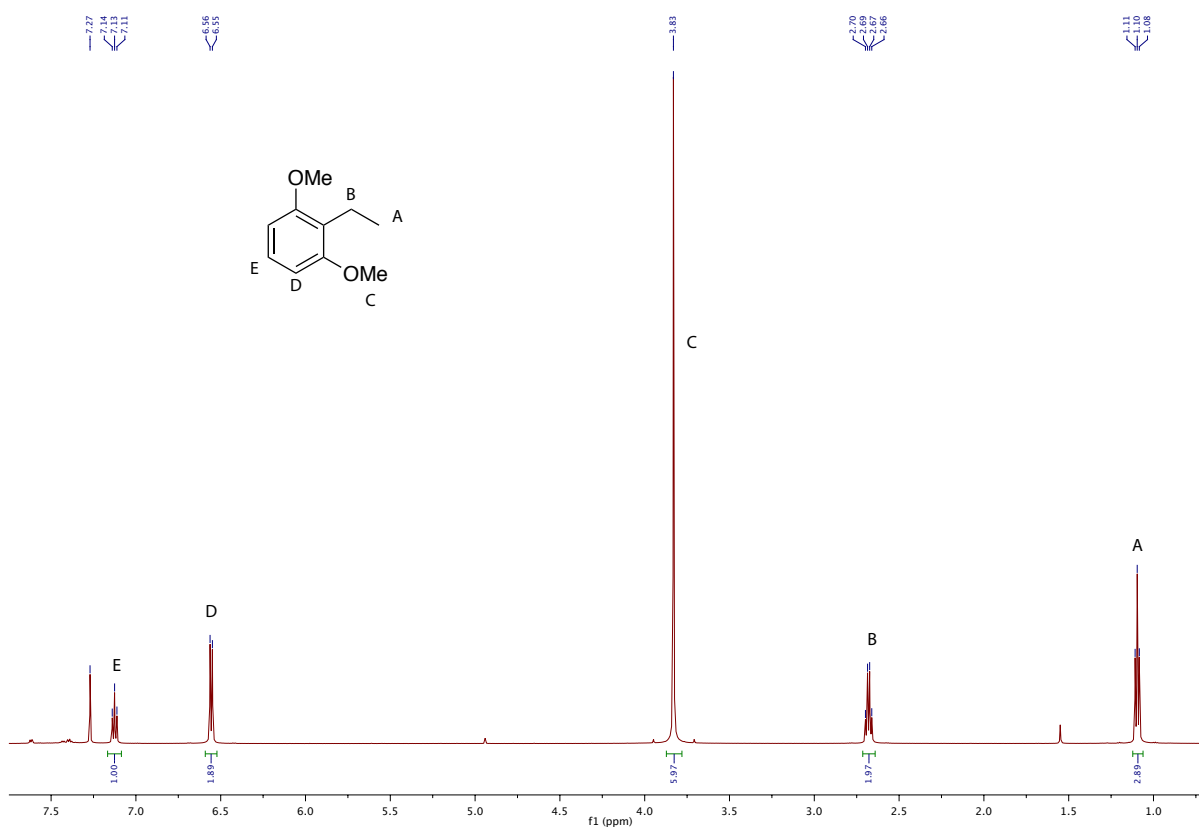

**Figure S31.**  $^{13}\text{C}\{^1\text{H}\}$  NMR spectrum of 2-ethyl-1,3-dimethoxybenzene from the deoxygenation reaction of 2',6'-dimethoxyacetophenone with phenylsilane catalyzed by **2**.

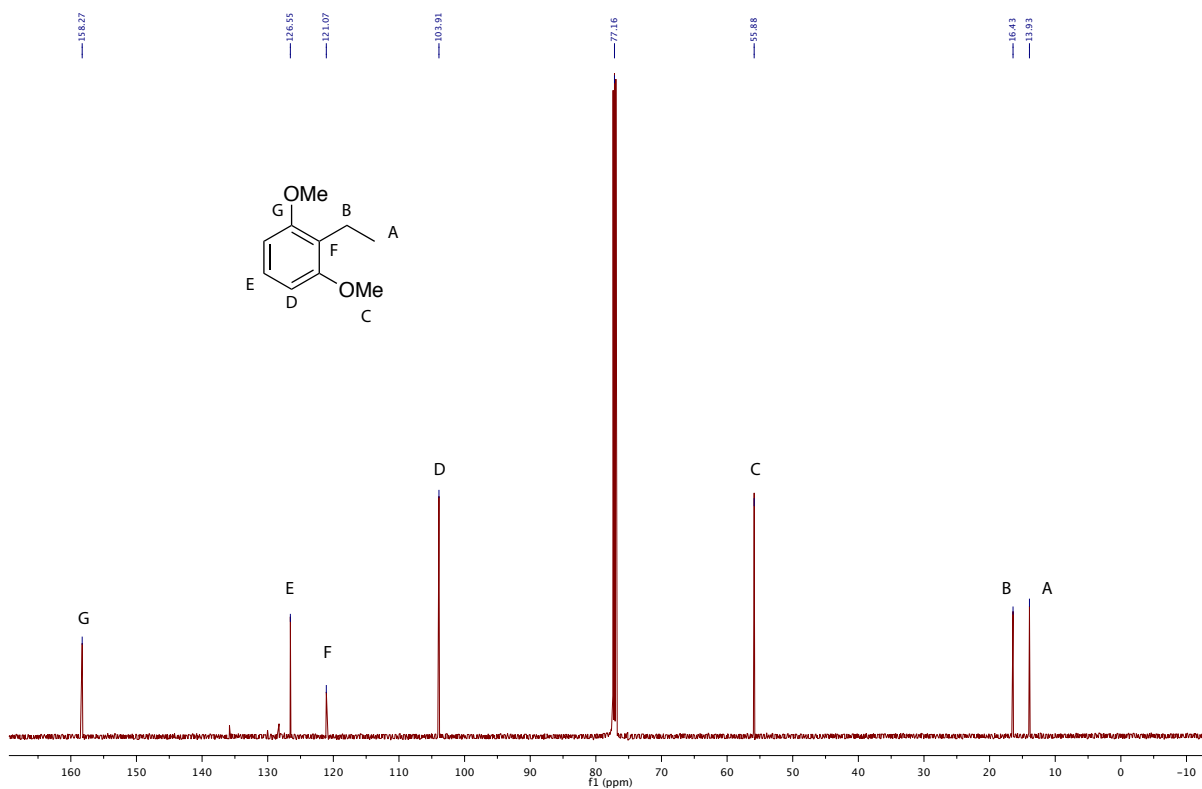

**Figure S32.** Gas chromatogram of 2-ethyl-1,3-dimethoxybenzene from the deoxygenation reaction of 2',6'-dimethoxyacetophenone with phenylsilane catalyzed by **2**. Retention time: 6.66 min. Fragmentation: 166.1 ( $M^+$ ), 151.1 ( $M^+ - CH_3$ ), 91.1 ( $M^+ - CH_3 - OCH_3 - OCH_3$ ).

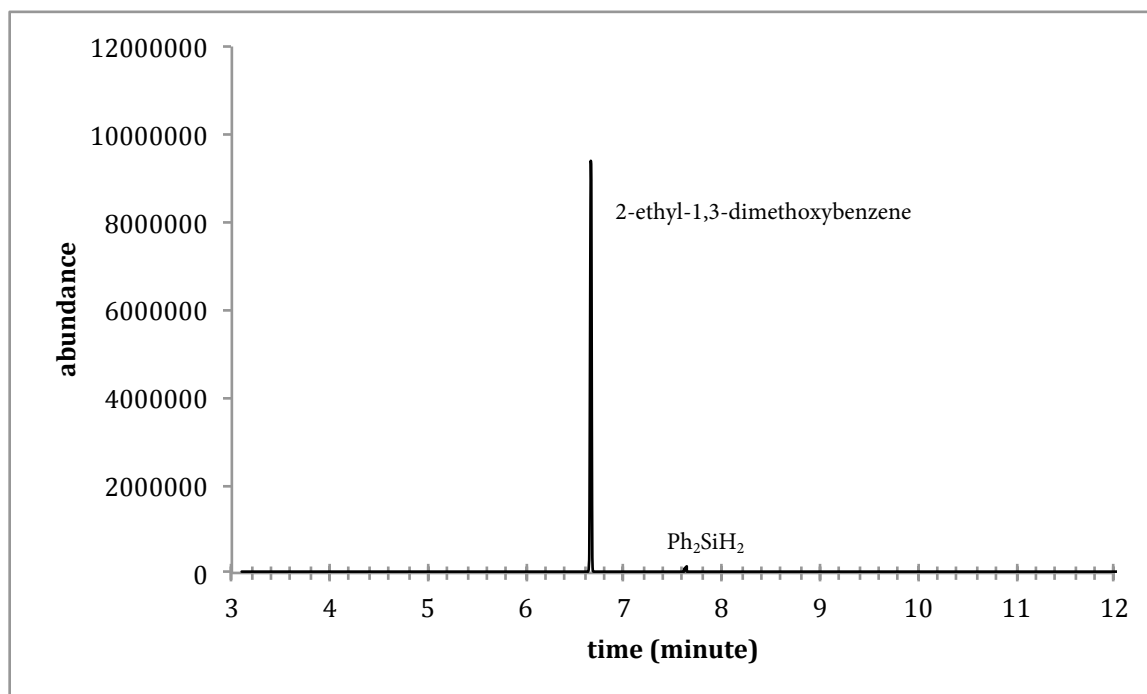

**Figure S33.**  $^1\text{H}$  NMR spectrum of 1,3,5-trimethoxy-2-methylbenzene from the deoxygenation reaction of 2,4,6-trimethoxybenzaldehyde with phenylsilane catalyzed by **2**. The product is isolated by distillation and its purity is confirmed by GC (see Figure S34 below).

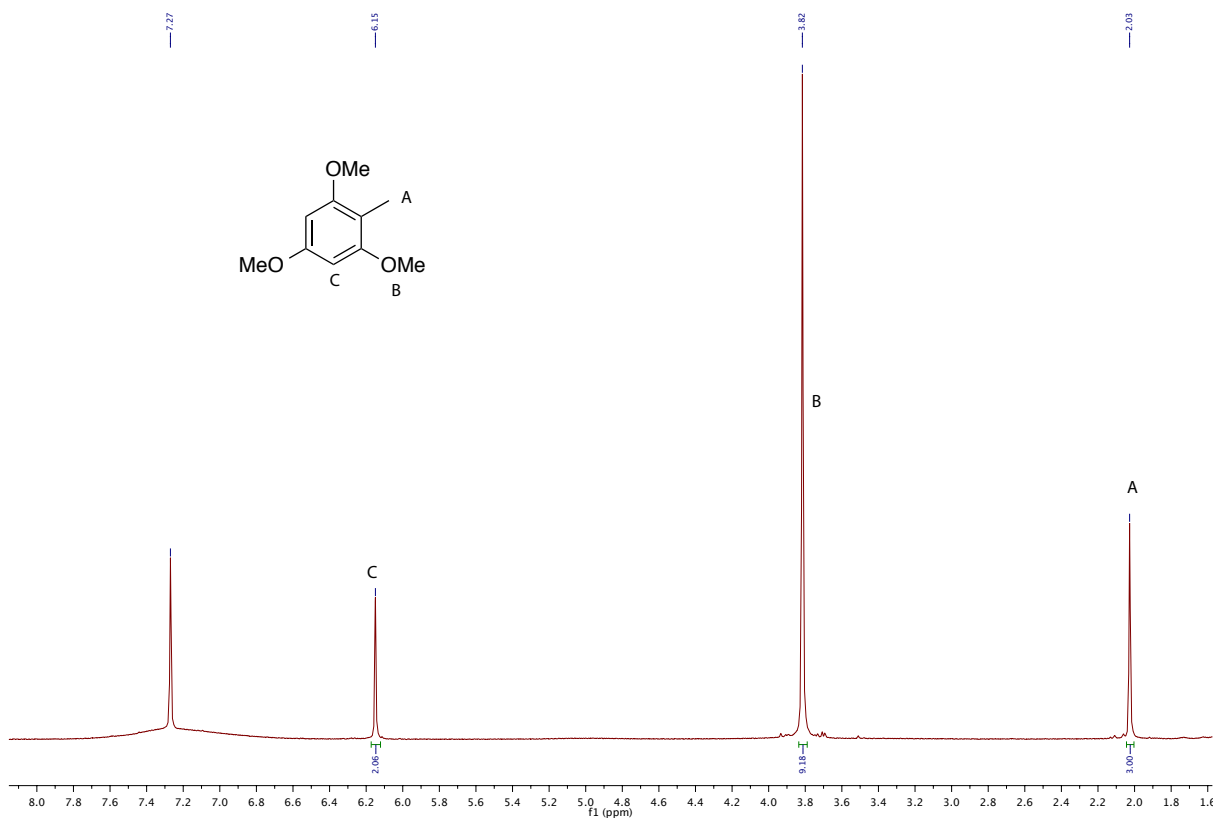

**Figure S34.**  $^{13}\text{C}\{^1\text{H}\}$  NMR spectrum of 1,3,5-trimethoxy-2-methylbenzene from the deoxygenation reaction of 2,4,6-trimethoxybenzaldehyde with phenylsilane catalyzed by **2**.

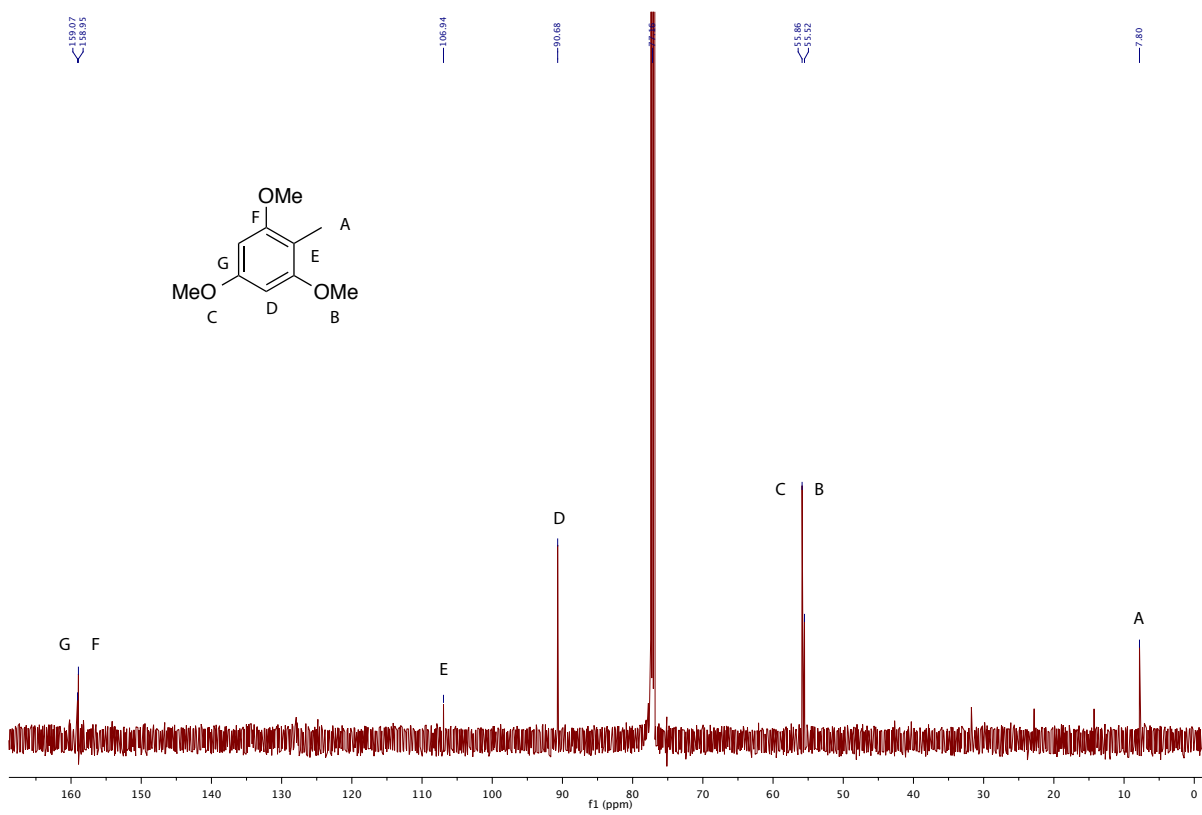

**Figure S35.** GC chromatograph of 1,3,5-trimethoxy-2-methylbenzene from the deoxygenation reaction of 2,4,6-trimethoxybenzaldehyde with phenylsilane catalyzed by **2**. Retention time: 7.90 min. Fragmentation: 182.1 ( $M^+$ ), 167.1 ( $M^+ - CH_3$ ), 151.1 ( $M^+ - OCH_3$ ).

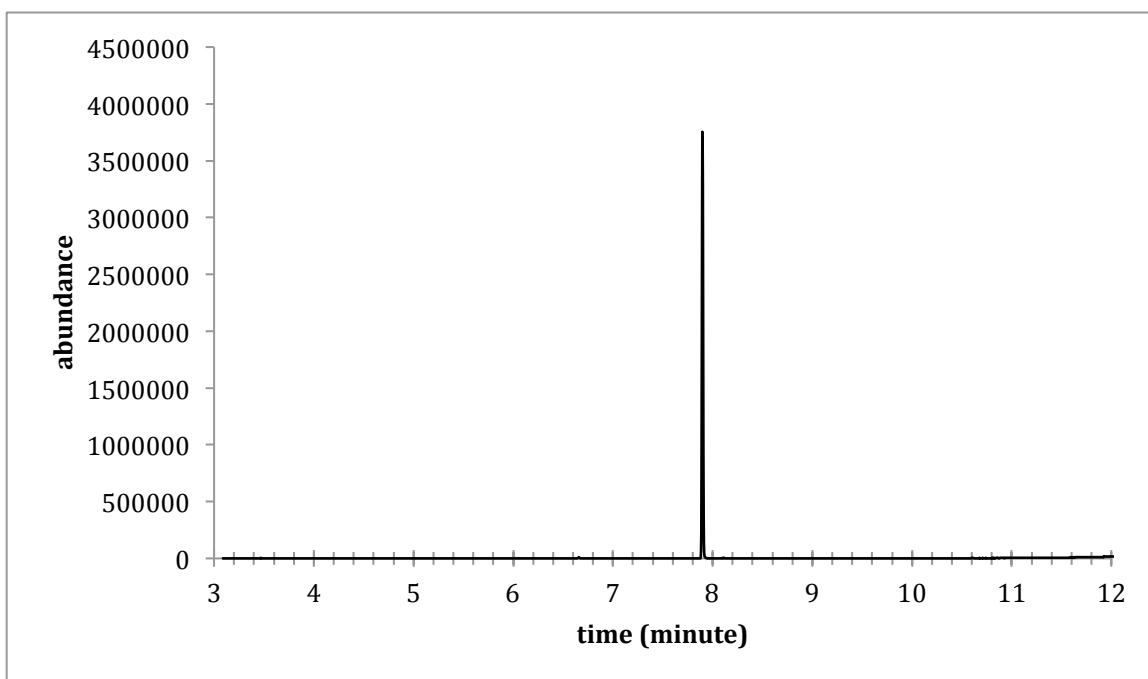



## References.

1. Xu, S.; Manna, K.; Ellern, A.; Sadow, A. D., *Organometallics* **2014**, *33*, 6840-6860.
2. Massey, A. G.; Park, A. J., *J. Organomet. Chem.* **1964**, *2*, 245-250.
3. Hirai, T.; Hamasaki, A.; Nakamura, A.; Tokunaga, M., *Org. Lett.* **2009**, *11*, 5510-5513.
4. Matsubara, K.; Iura, T.; Maki, T.; Nagashima, H., *J. Org. Chem.* **2002**, *67*, 4985-4988.
5. Sakai, N.; Moriya, T.; Konakahara, T., *J. Org. Chem.* **2007**, *72*, 5920-5922.
6. Biermann, U.; Metzger, J. O., *ChemSusChem* **2014**, *7*, 644-649.
7. Smith, M. B.; Hrubiec, R. T.; Zezza, C. A., *J. Org. Chem.* **1985**, *50*, 4815-4821.
8. Wu, K.; Chen, Q.-Y., *J. Fluorine Chem.* **2002**, *113*, 79-83.
9. Pohl, R.; Dračinský, M.; Slavětinská, L.; Buděšínský, M., *Magn. Reson. Chem.* **2011**, *49*, 320-327.
10. Hanada, S.; Tsutsumi, E.; Motoyama, Y.; Nagashima, H., *J. Am. Chem. Soc.* **2009**, *131*, 15032-15040.
11. Azzena, U.; Denurra, T.; Melloni, G.; Piroddi, A. M., *J. Org. Chem.* **1990**, *55*, 5386-5390.
12. Haro, T. d.; Nevado, C., *J. Am. Chem. Soc.* **2010**, *132*, 1512-1513.
13. Ahlrichs, R.; Bär, M.; Häser, M.; Horn, H.; Kölmel, C., *Chem. Phys. Lett.* **1989**, *162*, 165-169.
14. (a) Becke, A. D., *J. Chem. Phys.* **1993**, *98*, 5648-5652; (b) Lee, C. T.; Yang, W. T.; Parr, R. G., *Phys. Rev. B* **1988**, *37*, 785-789; (c) Vosko, S. H.; Wilk, L.; Nusair, M., *Can. J. Phys.* **1980**, *58*, 1200-1211; (d) Stephens, P. J.; Devlin, F. J.; Chabalowski, C. F.; Frisch, M. J., *J. Phys. Chem.* **1994**, *98*, 11623-11627.
15. Andrae, D.; Häußermann, U.; Dolg, M.; Stoll, H.; Preuß, H., *Theor. Chim. Acta* **1990**, *77*, 123-141.
16. (a) Krishnan, R.; Binkley, J. S.; Seeger, R.; Pople, J. A., *J. Chem. Phys.* **1980**, *72*, 650-654; (b) McLean, A. D.; Chandler, G. S., *J. Chem. Phys.* **1980**, *72*, 5639-5648.
17. Valiev, M.; Bylaska, E. J.; Govind, N.; Kowalski, K.; Straatsma, T. P.; Van Dam, H. J. J.; Wang, D.; Nieplocha, J.; Apra, E.; Windus, T. L.; de Jong, W. A., *Comput. Phys. Commun.* **2010**, *181*, 1477-1489.
18. (a) Ditchfield, R., *Mol. Phys.* **1974**, *27*, 789-807; (b) Wolinski, K.; Hinton, J. F.; Pulay, P., *J. Am. Chem. Soc.* **1990**, *112*, 8251-8260.
19. Martins, L. S. C.; de Souza, F. A. L.; Ceolin, G. A.; Jorge, F. E.; de Berrêdo, R. C.; Campos, C. T., *Comput. Theor. Chem.* **2013**, *1013*, 62-69.
